# Supplementary material
Source: Elsevier journal article supplement (https://rcastoragev2.blob.core.windows.net/6cfa61e54df30c94ed17291b32fd96f9/mmc1.pdf)
Supplement: mmc1 [file mmc1.pdf]

# THE LANCET

## **Supplementary webappendix**

This webappendix formed part of the original submission and has been peer reviewed. We post it as supplied by the authors.

Supplement to: Nair H, Nokes DJ, Gessner BD, Dherani M, Madhi SA, Singleton RJ, et al. Global burden of acute lower respiratory infections due to respiratory syncytial virus in young children: a systematic review and meta-analysis. *Lancet* 2010; published online April 16. DOI:10.1016/S0140-6736(10)60206-1

# **Web Appendix**

**for**

**“Global burden of acute lower  
respiratory infections due to  
respiratory syncytial virus in  
young children: a systematic  
review and meta-analysis”**

## Table of Contents

| <b>S.<br/>No</b> | <b>Item</b>                                                                                                                  | <b>Page No.</b> |
|------------------|------------------------------------------------------------------------------------------------------------------------------|-----------------|
| 1                | Supplementary Panel: Search Strategy in Databases                                                                            | III-IV          |
| 2                | Supplementary Table 1: Charactersitics of hospital based studies included under severe ALRI in this paper                    | V               |
| 3                | Supplementary Table 2: Limiting factors of studies with unpublished data reporting incidence of RSV-ALRI in under-5 children | VI              |
| 4                | Supplementary Table 3: Meta-analysis of incidence rates of RSV-ALRI for children <1 year old                                 | VII             |
| 5                | Supplementary Table 4: Meta-analysis of incidence rates of RSV-ALRI for children <5 year old                                 | VIII            |
| 6                | Supplementary Table 5: Meta-analysis of incidence rates of RSV-severe ALRI for children <1 year old                          | IX-X            |
| 7                | Supplementary Table 6: Meta-analysis of incidence rates of RSV-severe ALRI for children <5 year old                          | X-XI            |
| 8                | Supplementary Table 7: CFR due to RSV-ALRI in hospitalised children <5 years                                                 | XII-XIII        |
| 9                | Supplementary Table 8: Hypoxemia in under-5 children hospitalised with RSV-ALRI                                              | XIV             |
| 10               | Supplementary Figure 1                                                                                                       | XV              |
| 11               | Supplementary Figure 2                                                                                                       | XVI             |
| 12               | Supplementary Figure 3                                                                                                       | XVII            |
| 13               | Supplementary Figure 4                                                                                                       | XVIII           |
| 14               | Supplementary Figure 5                                                                                                       | XIX             |
| 15               | Supplementary Figure 6                                                                                                       | XX              |
| 16               | Supplementary Figure 7                                                                                                       | XXI             |
| 17               | Supplementary Figure 8                                                                                                       | XXII            |
| 18               | Supplementary Figure 9                                                                                                       | XXIII           |
| 19               | Supplementary Figure 10                                                                                                      | XXIV            |
| 20               | Supplementary Figure 11                                                                                                      | XXV             |
| 21               | Supplementary Figure 12                                                                                                      | XXVI            |
| 22               | Supplementary Figure 13                                                                                                      | XXVII           |
| 23               | Supplementary Figure 14                                                                                                      | XXVIII          |
| 24               | Supplementary Figure 15                                                                                                      | XXIX            |
| 25               | References                                                                                                                   | XXX-XXXIII      |
| 25               | Glossary                                                                                                                     | XXXIII          |

## **Supplementary Panel: Search Strategy in Databases**

### **Medline (Ovid)**

1. exp Respiratory Syncytial Viruses/ or Respirovirus Infections/ or exp Respiratory Syncytial Virus Infections/
2. Respiratory Syncytial Virus\$.mp.
3. \*Respiratory Syncytial Virus, Human/
4. RSV.mp.
5. 1 or 2 or 3 or 4
6. exp Pneumonia, Viral/
7. bronchiolitis.mp. or exp Bronchiolitis, Viral/ or exp Bronchiolitis/
8. exp Respiratory Tract Diseases/ or exp Respiratory Tract Infections/ or acute respiratory illness\$.mp.
9. 6 or 7 or 8
10. aetiology.mp.
11. etiology.mp.
12. cause\$.mp.
13. 10 or 11 or 12
14. 9 and 13
15. exp Morbidity/
16. exp Mortality/
17. 15 or 16
18. 5 and 14 and 17
19. limit 18 to (humans and "all child (0 to 18 years)")

### **Embase**

1. exp Respiratory Syncytial Pneumovirus/ or Respiratory Syncytial Virus.mp.
2. RSV.mp.
3. 1 or 2
4. exp Respiratory Tract Infection/ or exp Acute Respiratory Tract Disease/ or exp Pneumonia/ or acute respiratory illness\$.mp.
5. exp VIRUS PNEUMONIA/
6. exp VIRUS ETIOLOGY/ or exp ETIOLOGY/ or etiology.mp.
7. aetiology.mp.
8. cause\$.mp.
9. 6 or 7 or 8
10. 4 and 9
11. 5 and 9
12. 10 or 11
13. morbidity.mp. or exp MORBIDITY/
14. exp MORTALITY/ or mortality.mp. or exp CHILDHOOD MORTALITY/
15. 13 or 14
16. 3 and 12 and 15
17. limit 16 to (human and child )

### **Global health**

1. Human respiratory syncytial virus.od. or Respiratory Syncytial Virus.mp.
2. RSV.mp.
3. 1 or 2
4. respiratory diseases.sh. or acute respiratory illness\$.mp.
5. pneumonia.sh.
6. bronchiolitis.mp.
7. 4 or 5 or 6
8. exp morbidity/
9. exp mortality/
10. 8 or 9
11. 3 and 7 and 10

12. limit 11 to yr="1995 - 2009"

**CINAHL, WHOLIS and Web of Science**

Respiratory Syncytial Virus

OR

RSV

AND

Acute respiratory infection

AND

Children

**LILACS, IndMed and SIGLE**

Respiratory Syncytial Virus

AND

Children

**Supplementary table 1: Characteristics of hospital-based studies included under severe-ALRI in this paper**

| Location (reference)                                                 | Criteria for inclusion in study                                                                                                                                           | Remarks                                                                                                                |
|----------------------------------------------------------------------|---------------------------------------------------------------------------------------------------------------------------------------------------------------------------|------------------------------------------------------------------------------------------------------------------------|
| Gipuzoka, Spain <sup>18</sup>                                        | RSV in NPA, patient's clinical condition warranted hospital admission, discharge diagnosis of ARI                                                                         |                                                                                                                        |
| Kiel, Germany <sup>19</sup>                                          | Diagnosis of ARI, hospitalisation                                                                                                                                         |                                                                                                                        |
| Multicentric, Germany <sup>23</sup>                                  | LRTI- croup, bronchitis, bronchiolitis, pneumonia, apnoea >20 sec (in infants <6 months)                                                                                  | 0.1 to 2.3% cases had apnoea                                                                                           |
| Shropshire, United Kingdom <sup>24</sup>                             | RSV related hospitalisation- positive RSV IF within seven days of admission. Includes diagnosis of bronchiolitis, pneumonia and croup                                     |                                                                                                                        |
| Northern Stockholm, Sweden <sup>25</sup>                             | Hospitalised for virologically confirmed RSV infection                                                                                                                    | 12% cases required ICU admission and 2.1% cases required ventilatory support                                           |
| Southern Austria, Austria <sup>26</sup>                              | Hospitalisation with viral U/LRTI (classified according to LRI score 0 to 5 for severity)                                                                                 | Mean LRI score was 2.9 corresponding to moderate LRTI with signs of respiratory distress. 3.4% required ICU admission. |
| United Kingdom <sup>27</sup>                                         | All hospital admissions with ICD codes associated with LRI                                                                                                                |                                                                                                                        |
| Netherlands <sup>28</sup>                                            | Inpatient data from virological surveillance in patients having LRTI using ICD-9CM codes                                                                                  |                                                                                                                        |
| Takhli district, Thailand <sup>32</sup>                              | All hospital admissions associated with physician diagnosed LRI                                                                                                           | 64% had pneumonia, 34% had bronchitis and 3% had bronchiolitis                                                         |
| Eastern and Northern New Territories, Hong Kong, China <sup>33</sup> | Patients admitted with respiratory symptoms and RSV detected within 7 days of admission                                                                                   |                                                                                                                        |
| Townsville (Queensland), Australia <sup>34</sup>                     | Hospitalisation with proven RSV bronchiolitis                                                                                                                             | 27% required supplemental oxygen                                                                                       |
| Monroe and Davidson County, USA <sup>20</sup>                        | Hospitalised with physician diagnosis of ARI or ARI related condition (pneumonia, bronchiolitis, croup, apnoea, asthma, pharyngitis, paroxysmal cough, Otitis media etc.) |                                                                                                                        |
| Milwaukee, USA <sup>36</sup>                                         | Hospitalisation for LRI (all LRI related ICD-9 codes searched)                                                                                                            |                                                                                                                        |
| Tennessee, USA <sup>37</sup>                                         | Children born between July 1989 and June 1993, enrolled at birth in Tennessee Medicaid and admitted for RSV infection or bronchiolitis                                    |                                                                                                                        |
| USA <sup>38</sup>                                                    | Hospitalisation for RSV associated illness ICD-9-CM codes 079.6, 466.11, 480.1                                                                                            |                                                                                                                        |
| American Indians, Alaskan Natives, USA and Rest of USA <sup>39</sup> | Hospital discharge survey. ICD-9-CM codes 466.11, 480.1, 079.6                                                                                                            |                                                                                                                        |
| Hawaii, USA <sup>21</sup>                                            | Hospital discharge records with ICD-9-CM codes for RSV, pneumonia or bronchiolitis (466.1, 466.11, 480.1, 079.6)                                                          |                                                                                                                        |
| Nashville, Rochester and Cincinnati, USA <sup>40</sup>               | Hospitalised patients with LRI                                                                                                                                            | 95% required supplemental oxygen                                                                                       |
| Rio de Janeiro, Brazil <sup>41</sup>                                 | Hospitalised patients with LRI                                                                                                                                            |                                                                                                                        |

**Supplementary table 2: Limiting factors of studies with unpublished data reporting incidence of RSV-ALRI in under-5 children**

| Location<br>(Reference)                                                 | % of eligible cases<br>not tested for RSV<br>(N) | Reason for not testing                                                                                                                                                                                                                                                                        | Distance of farthest hamlet from health<br>facility and ease of access                                                                                                                                                                                                           |
|-------------------------------------------------------------------------|--------------------------------------------------|-----------------------------------------------------------------------------------------------------------------------------------------------------------------------------------------------------------------------------------------------------------------------------------------------|----------------------------------------------------------------------------------------------------------------------------------------------------------------------------------------------------------------------------------------------------------------------------------|
| Kilifi birth cohort,<br>Kenya (Nokes et<br>al.)                         | 6 (67/1056)                                      | (1) Rehospitalisation within 14 days; (2)<br>Refused test; (3) Sample lost in lab                                                                                                                                                                                                             | Approximately 30 km. Ease of access highly<br>variable. 30 km along coast road may take<br>approximately 45-60min, but 10 km inland<br>may take >1hr                                                                                                                             |
| Kilifi hospital<br>study, Kenya<br>(Nokes et al.)                       | 17 (671/3998)                                    | (1) Age 0 days; (2) Diagnosis of neonatal<br>tetanus; (3) Refused RSV test; (4)<br>Discharged or died before test; (5) Not<br>conforming to case definitions 1 & 2                                                                                                                            | Approximately 30 km. Ease of access highly<br>variable. 30 km along coast road may take<br>approximately 45-60min, but 10 km inland<br>may take >1hr                                                                                                                             |
| Manhica district,<br>Mozambique<br>(Roca et al.)                        | 9 (96/1055)                                      | (1) Refused test; (2) Sample less likely to be<br>collected among children >1 year of age, as<br>they followed a different protocol i.e.<br>samples were only collected if admitted; (3)<br>Among admitted, less likely to collect<br>sample if admitted over the night or during<br>weekends | Farthest household is approximately 11 km<br>from the hospital. The road condition is poor<br>and as a result may take approximately 30<br>minutes to reach by car                                                                                                               |
| Soweto, South<br>Africa (Madhi et<br>al.)                               | 4 (203/4919)                                     | (1) Rehospitalisation within 28 days; (2)<br>Refused test; (3) Discharged or died before<br>test                                                                                                                                                                                              | Urban area- so ease of access not a limitation.                                                                                                                                                                                                                                  |
| Bandung,<br>Indonesia (Simões<br>et al.)                                | 20 (160/802)                                     | (1)Refused test; (2) Some samples not<br>collected because hospital/laboratory closed<br>on week ends; (3) Older children sometimes<br>did not go to the health centre                                                                                                                        | Two sites: peri urban site with easy access to<br>health center. Rural site in hilly area with<br>more difficult access. Furthest distance<br>approximately 15km. Roads reasonable, easy<br>access by <i>ojek</i> (motorcycle taxi) and<br>transportation was paid for by study. |
| Lombok,<br>Indonesia (Gessner<br>et al.)                                | 28 (1386/4994)                                   | (1) Critically ill ; (2) Admitted on Friday or<br>Sunday night and discharged / died before<br>sample could be collected                                                                                                                                                                      | Approximately 30 km. All households are<br>relatively close to a road. Ease of access<br>variable depending upon road condition.<br>Certain roads may be closed during rainy<br>season.                                                                                          |
| Alaska, USA<br>(Singleton et al.)                                       | 22 (241/1107)                                    | (1) Seasonal (e.g. less likely to test in the<br>summer months); (2) Clinical syndrome not<br>likely to be RSV (e.g. croup, lobar<br>pneumonia, URI with fever etc.)                                                                                                                          | Villages in YK Delta are connected to one<br>another only by airplane, boat or snow<br>machine. Ease of access to hospital fairly<br>good.                                                                                                                                       |
| Navajo and White<br>Mountain Apache<br>reservations, USA<br>(Epi Study) | 30                                               | (1) Evening or weekend admissions; (2) Age<br>>2 yrs                                                                                                                                                                                                                                          |                                                                                                                                                                                                                                                                                  |
| San Marcos,<br>Guatemala (Bruce<br>et al.)                              | 11 (29/263)                                      | Refused test                                                                                                                                                                                                                                                                                  |                                                                                                                                                                                                                                                                                  |

**Supplementary table 3: Meta-analysis of incidence rates of RSV-ALRI for children <1 year old**

| DEVELOPING COUNTRIES                                      |           | 0-<1 year      |
|-----------------------------------------------------------|-----------|----------------|
| Passive ascertainment (n=1; meta-analysis not applicable) |           |                |
| Active ascertainment (n= 5 + 1 Imputed)                   |           |                |
| <i>Individual estimates</i>                               | <i>IR</i> | <i>95% CI</i>  |
| Kilifi birth cohort, Kenya (Nokes et al.)                 | 104       | 83.0, 130.2    |
| Ibadan, Nigeria <sup>22</sup>                             | 116       | 107.3, 125.4   |
| Mirzapur, Bangladesh <sup>30</sup>                        | 32        | 20.8, 49.2     |
| Ballabgarh, India <sup>31</sup>                           | 33        | 15.3, 71.1     |
| Bandung, Indonesia (Simões et al.)                        | 53        | 40.8, 68.9     |
| San Marcos, Guatemala (Bruce et al.)                      | 158       | 122.3, 202.8   |
| <i>Pooled estimate</i>                                    | <i>IR</i> | <i>95% CI</i>  |
| Fixed effects                                             | 107       | 100.1, 114.5   |
| Random effects ( <i>see Supplementary Figure 4</i> )      | 74.2      | 50.2, 109.7    |
| p for heterogeneity                                       | <0.00005  |                |
| Active and passive ascertainment (n= 6 + 1 Imputed)       |           |                |
| <i>Individual estimates</i>                               | <i>IR</i> | <i>95% CI</i>  |
| Kilifi birth cohort, Kenya (Nokes et al.)                 | 104       | 83.04, 130.26  |
| Manhica district, Mozambique (Roca et al.)                | 43.6      | 30.39, 62.56   |
| Ibadan, Nigeria <sup>22</sup>                             | 116       | 107.32, 125.38 |
| Mirzapur, Bangladesh <sup>30</sup>                        | 32        | 20.83, 49.16   |
| Ballabgarh, India <sup>31</sup>                           | 33        | 15.32, 71.11   |
| Bandung, Indonesia (Simões et al.)                        | 53        | 40.8, 68.9     |
| San Marcos, Guatemala (Bruce et al.)                      | 157.5     | 122.31, 202.82 |
| <i>Pooled estimate</i>                                    | <i>IR</i> | <i>95% CI</i>  |
| Fixed effects                                             | 103.9     | 97.2, 111.0    |
| Random effects ( <i>see Supplementary Figure 5</i> )      | 68.4      | 46.5, 100.5    |
| p for heterogeneity                                       | <0.00005  |                |
| INDUSTRIALISED COUNTRIES                                  |           | 0-<1 year      |
| Passive ascertainment (n=1; meta-analysis not applicable) |           |                |



**Supplementary table 4: Meta-analysis of incidence rates of RSV-ALRI for children <5 years old**

| DEVELOPING COUNTRIES                                      |          | 0-<5year    |
|-----------------------------------------------------------|----------|-------------|
| Passive ascertainment (n=1; meta-analysis not applicable) |          |             |
| Active ascertainment (n=2 + 4 Imputed)                    |          |             |
| Individual estimates                                      | IR       | 95% CI      |
| Kilifi birth cohort, Kenya (Nokes et al.)                 | 84       | 67.1, 105.2 |
| Ibadan, Nigeria <sup>22</sup>                             | 94       | 89.1, 99.1  |
| Mirzapur, Bangladesh <sup>30</sup>                        | 22       | 14.3, 33.8  |
| Ballabgarh, India <sup>31</sup>                           | 27       | 13.7, 53.2  |
| Bandung, Indonesia (Simões et al.)                        | 48       | 41.2, 56.0  |
| San Marcos, Guatemala (Bruce et al.)                      | 128      | 99.4, 164.8 |
| Pooled estimate                                           | IR       | 95% CI      |
| Fixed effects                                             | 86.5     | 82.5, 90.7  |
| Random effects (see Supplementary Figure 6)               | 59.1     | 40.0, 87.5  |
| p for heterogeneity                                       | <0.00005 |             |
| Active and passive ascertainment (n=2 + 5 Imputed)        |          |             |
| Individual estimates                                      | IR       | 95% CI      |
| Kilifi birth cohort, Kenya (Nokes et al.)                 | 84       | 67.1, 105.2 |
| Manhica district, Mozambique (Roca et al.)                | 36       | 27.9, 46.4  |
| Ibadan, Nigeria <sup>22</sup>                             | 94       | 89.1, 99.1  |
| Mirzapur, Bangladesh <sup>30</sup>                        | 22       | 14.3, 33.8  |
| Ballabgarh, India <sup>31</sup>                           | 27       | 13.7, 53.2  |
| Bandung, Indonesia (Simões et al.)                        | 48       | 41.2, 56.0  |
| San Marcos, Guatemala (Bruce et al.)                      | 128      | 99.4, 164.8 |
| Pooled estimate                                           | IR       | 95% CI      |
| Fixed effects                                             | 83.9     | 80.1, 88.0  |
| Random effects (see Supplementary Figure 7)               | 54.6     | 37.1, 80.4  |
| p for heterogeneity                                       | <0.00005 |             |
| INDUSTRIALISED COUNTRIES                                  |          | 0-<5 year   |
| Passive ascertainment (n=1; meta-analysis not applicable) |          |             |

**Supplementary table 5: Meta-analysis of incidence rates of RSV-severe ALRI for children <1 years old**

| DEVELOPING COUNTRIES                                      |           | 0-<1 year     |
|-----------------------------------------------------------|-----------|---------------|
| Passive ascertainment (n=6 + 4 Imputed)                   |           |               |
| <i>Individual estimates</i>                               | <i>IR</i> | <i>95% CI</i> |
| Kilifi hospital study, Kenya (Nokes et al.)               | 11        | 9.9, 12.2     |
| Manhica district, Mozambique (Roca et al.)                | 15.7      | 10.2, 24.1    |
| W. Region, Gambia <sup>29</sup>                           | 17.7      | 16.1, 19.5    |
| Soweto, S. Africa (Madhi et al.)                          | 10.4      | 9.4, 11.5     |
| Agincourt, S. Africa <sup>22</sup>                        | 15        | 9.6, 23.5     |
| Takhli district, Thailand (year 1) <sup>32</sup>          | 42        | 33.5, 52.7    |
| Takhli district, Thailand (year 2) <sup>32</sup>          | 19        | 14.1, 25.6    |
| Lombok, Indonesia (Gessner et al.)                        | 13.1      | 12.1, 14.2    |
| E. and N. New Territories, Hong Kong, China <sup>33</sup> | 10        | 9.5, 10.6     |
| Rio de Janeiro, Brazil <sup>41</sup>                      | 47        | 27.4, 80.6    |
| <i>Pooled estimate</i>                                    | <i>IR</i> | <i>95% CI</i> |
| Fixed effects                                             | 12.2      | 11.8, 12.6    |
| Random effects ( <i>see Supplementary Figure 8</i> )      | 16.4      | 13.2, 20.5    |
| p for heterogeneity                                       | <0.00005  |               |
| Active ascertainment (n=4 + 0 Imputed)                    |           |               |
| <i>Individual estimates</i>                               | <i>IR</i> | <i>95% CI</i> |
| Kilifi birth cohort, Kenya (Nokes et al.)                 | 13        | 5.0, 34.0     |
| Ballabgarh, India <sup>31</sup>                           | 14        | 4.2, 46.4     |
| Bandung, Indonesia (Simões et al.)                        | 17        | 10.7, 27.0    |
| San Marcos, Guatemala (Bruce et al.)                      | 60.2      | 40.0, 90.5    |
| <i>Pooled estimate</i>                                    | <i>IR</i> | <i>95% CI</i> |
| Fixed effects                                             | 30.2      | 22.7, 40.0    |
| Random effects ( <i>see Supplementary Figure 9</i> )      | 22.3      | 9.4, 52.9     |
| p for heterogeneity                                       | <0.00005  |               |
| Active and passive ascertainment (n=10 + 4 Imputed)       |           |               |
| <i>Pooled estimate</i>                                    | <i>IR</i> | <i>95% CI</i> |
| Fixed effects                                             | 12.4      | 11.9, 12.8    |
| Random effects ( <i>see Supplementary Figure 10</i> )     | 17.9      | 14.5, 22.2    |
| p for heterogeneity                                       | <0.00005  |               |
| INDUSTRIALISED COUNTRIES                                  |           | 0-<1 year     |
| Passive ascertainment (n=11 + 4 Imputed)                  |           |               |
| <i>Individual estimates</i>                               | <i>IR</i> | <i>95% CI</i> |
| Gipuzoka, Spain <sup>18</sup>                             | 25.5      | 22.9, 28.4    |
| Kiel, Germany <sup>19</sup>                               | 16.3      | 14.3, 18.5    |
| Multicentric, Germany <sup>23</sup>                       | 28        | 25.2, 31.1    |
| Shropshire, United Kingdom <sup>24</sup>                  | 28        | 25.6, 30.6    |
| N. Stockholm, Sweden <sup>25</sup>                        | 14        | 13.3, 14.8    |
| S. Austria, Austria <sup>26</sup>                         | 12        | 9.1, 15.8     |
| United Kingdom <sup>27</sup>                              | 28.3      | 27.9, 28.7    |
| Netherlands <sup>28</sup>                                 | 9.5       | 8.6, 10.5     |
| Townsville, Australia <sup>34</sup>                       | 18        | 14.6, 22.2    |
| Monroe & Davidson County, USA <sup>20</sup>               | 12.9      | 10.6, 15.8    |

|                                                       |                  |                      |
|-------------------------------------------------------|------------------|----------------------|
| Milwaukee, USA <sup>36</sup>                          | 20               | 18.6, 21.5           |
| Nashville, Tennessee, USA (Wright et al.)             | 9.5              | 5.3, 17.1            |
| Tennessee, USA <sup>37</sup>                          | 63.1             | 60.2, 66.1           |
| USA <sup>39</sup>                                     | 27.4             | 21.5, 34.9           |
| Nashville, Rochester, Cincinnati, USA <sup>40</sup>   | 11.1             | 10.1, 12.2           |
| <b><i>Pooled estimate</i></b>                         | <b><i>IR</i></b> | <b><i>95% CI</i></b> |
| Fixed effects                                         | 27.2             | 26.9, 27.6           |
| Random effects ( <i>see Supplementary Figure 11</i> ) | 19               | 14.6, 24.8           |
| p for heterogeneity                                   | <0.00005         |                      |

**Supplementary table 6: Meta-analysis of incidence rates of RSV-severe ALRI in children <5 years old**

| DEVELOPING COUNTRIES                                             |          | 0-<5 year  |
|------------------------------------------------------------------|----------|------------|
| Passive ascertainment (n=1 + 3 Imputed)                          |          |            |
| Individual estimates                                             | IR       | 95% CI     |
| Kilifi hospital study, Kenya (Nokes et al.)                      | 3        | 2.7, 3.3   |
| Manhica district, Mozambique (Roca et al.)                       | 4.3      | 2.9, 6.3   |
| W.Region, Gambia <sup>29</sup>                                   | 5        | 4.5, 5.5   |
| Soweto, S. Africa (Madhi et al.)                                 | 2.2      | 2.0, 2.4   |
| Agincourt, S. Africa <sup>22</sup>                               | 9        | 7.5, 10.8  |
| Takhli district, Thailand (year 1) <sup>32</sup>                 | 12.6     | 10.1, 15.8 |
| Takhli district, Thailand (year 2) <sup>32</sup>                 | 5.8      | 4.3, 7.8   |
| Lombok, Indonesia (Gessner et al.)                               | 4        | 3.7, 4.3   |
| E. and N. New Territories, Hong Kong, China, China <sup>33</sup> | 2.5      | 2.4, 2.6   |
| Rio de Janeiro, Brazil <sup>41</sup>                             | 14       | 8.1, 24.3  |
| Pooled estimate                                                  | IR       | 95% CI     |
| Fixed effects                                                    | 3.3      | 3.2, 3.4   |
| Random effects (see Supplementary Figure 12)                     | 5        | 3.7, 6.7   |
| p for heterogeneity                                              | <0.00005 |            |
| Active ascertainment (n=7 + 3 Imputed)                           |          |            |
| Individual estimates                                             | IR       | 95% CI     |
| Kilifi birth cohort, Kenya (Nokes et al.)                        | 4        | 1.5, 10.5  |
| Ballabgarh, India <sup>31</sup>                                  | 4        | 1.7, 9.4   |
| Bandung, Indonesia (Simões et al.)                               | 10       | 7.1, 14.1  |
| San Marcos, Guatemala (Bruce et al.)                             | 18       | 12.0, 27.1 |
| Pooled estimate                                                  | IR       | 95% CI     |
| Fixed effects                                                    | 10.8     | 8.5, 13.7  |
| Random effects (see Supplementary Figure 13)                     | 8.3      | 4.4, 15.6  |
| p for heterogeneity                                              | <0.00005 |            |
| Active and passive ascertainment (n=8 + 6 Imputed)               |          |            |
| Pooled estimate                                                  | IR       | 95% CI     |
| Fixed effects                                                    | 3.4      | 3.3, 3.5   |

|                                                       |          |          |
|-------------------------------------------------------|----------|----------|
| Random effects ( <i>see Supplementary Figure 14</i> ) | 5.6      | 4.3, 7.4 |
| p for heterogeneity                                   | <0.00005 |          |

| INDUSTRIALISED COUNTRIES                              |           | 0-<5 year     |
|-------------------------------------------------------|-----------|---------------|
| Passive ascertainment (n=10 + 5 Imputed)              |           |               |
| <i>Individual estimates</i>                           | <i>IR</i> | <i>95% CI</i> |
| Gipuzoka, Spain <sup>18</sup>                         | 6.2       | 5.6, 6.9      |
| Kiel, Germany <sup>19</sup>                           | 5         | 4.4, 5.7      |
| Multicentric, Germany <sup>23</sup>                   | 8         | 7.2, 8.9      |
| Shropshire, United Kingdom <sup>24</sup>              | 8         | 7.3, 8.7      |
| N. Stockholm, Sweden <sup>25</sup>                    | 4         | 3.8, 4.2      |
| S. Austria, Austria <sup>26</sup>                     | 4         | 3.0, 5.3      |
| United Kingdom <sup>27</sup>                          | 8         | 7.9, 8.1      |
| Netherlands <sup>28</sup>                             | 3         | 2.7, 3.4      |
| Townsville, Australia <sup>34</sup>                   | 5         | 4.1, 6.2      |
| Monroe & Davidson County, USA <sup>20</sup>           | 3.5       | 2.9, 4.2      |
| Milwaukee, USA <sup>36</sup>                          | 5.8       | 5.4, 6.3      |
| Nashville, Tennessee, USA (Wright et al.)             | 3         | 1.7, 5.5      |
| Tennessee, USA <sup>37</sup>                          | 19        | 18.1, 19.9    |
| USA <sup>39</sup>                                     | 8         | 6.5, 9.9      |
| Nashville, Rochester, Cincinnati, USA <sup>40</sup>   | 3         | 2.7, 3.3      |
| <i>Pooled estimate</i>                                | <i>IR</i> | <i>95% CI</i> |
| Fixed effects                                         | 7.8       | 7.7, 7.9      |
| Random effects ( <i>see Supplementary Figure 15</i> ) | 5.5       | 4.2, 7.2      |
| p for heterogeneity                                   | <0.00005  |               |

**Supplementary table 7: Case fatality rates due to RSV-ALRI in hospitalised children <5 years**

| Location (Reference)                            | Study period; no. of RSV seasons            | Subjects: age group (setting) | RSV case fatality rate % (N) |
|-------------------------------------------------|---------------------------------------------|-------------------------------|------------------------------|
| Europe, Western                                 |                                             |                               |                              |
| Athens, Greece <sup>57</sup>                    | February 1997 - June 2000; 4 RSV seasons    | <1 y (IP) *                   | 0.7 (2/291)                  |
| Northern Stockholm, Sweden <sup>25</sup>        | 1987-1998; 12 RSV seasons                   | <1 y (IP)                     | 0.3 (5/1500)                 |
| Multicentric, Germany <sup>23</sup>             | November 1999- October 2001; 2 RSV seasons  | <4 y (IP)                     | 0.3 (5/701)                  |
| Shropshire, United Kingdom <sup>24</sup>        | April 1996- March 1999                      | <2 y (IP)                     | 0.2 (1/497)                  |
| Berne, Switzerland <sup>58</sup>                | July 1997 - June 2001; 4 RSV seasons        | <5 y (IP)                     | 0.2 (1/497)                  |
| Freiburg, Germany <sup>59</sup>                 | April 1997 - March 1999; 2 RSV seasons      | <5 y (IP)                     | 0.7 (2/276)                  |
| Southern Austria, Austria <sup>26</sup>         | November 1999 - October 2000; 1 RSV season  | <1 y (IP)                     | 0 (0/58)                     |
| Multicentric, Germany <sup>60</sup>             | 1999 - 2005; 6 RSV seasons                  | <1 y (IP)                     | 0.5 (6/1162)                 |
| Multicentric, Israel <sup>61</sup>              | November 2000 - March 2001; 1 RSV season    | <1 y (PICU) †                 | 4.8 (5/105)                  |
| Sub-Saharan Africa, East                        |                                             |                               |                              |
| Kilifi birth cohort, Kenya (Nokes et al.)       | January 2002 - May 2005; 3 RSV seasons      | <30 months (OP)               | 0 (0/409)                    |
| Kilifi hospital admission, Kenya (Nokes et al.) | January 2002 - December 2007; 5 RSV seasons | <1 y (IP)                     | 2.2 (9/406)                  |
|                                                 |                                             | <5 y(IP)                      | 2.4 (12/510)                 |
| Manhica, Mozambique <sup>62</sup>               | October 1998 - May 2000                     | <5 y (IP)                     | 3.4 (4/116)                  |
| Sub-Saharan Africa, West                        |                                             |                               |                              |
| Western Region, The Gambia <sup>29</sup>        | October 1993 - December 1996; 4 RSV seasons | <2 y (IP)                     | 2 (10/511)                   |
| Sub-Saharan Africa, Southern                    |                                             |                               |                              |
| Cape Town, South Africa <sup>63</sup>           | June 1995 - August 1996; 2 RSV seasons      | <2 y (IP)                     | 2.1                          |
| Pretoria, South Africa <sup>64</sup>            | November 1994 - October 1995                | <5 y (PICU)                   | 14.3 (1/7)                   |
| Soweto, South Africa (Madhi et al.)             | March 1998 - October 2004; 5 RSV seasons    | <1 y (IP)                     | 1.6 (10/633)                 |
|                                                 |                                             | <5 y (IP)                     | 1.3 (11/832)                 |
| Asia, South East                                |                                             |                               |                              |
| Takhli district, Thailand <sup>32</sup>         | November 1998-February 2001; 2 RSV seasons  | <5 y (IP)                     | 0 (0/122)                    |
| Lombok, Indonesia (Gessner et al.)              | January 2000 - December 2002; 3 RSV seasons | <1 y (IP)                     | 2.1 (13/617)                 |
|                                                 |                                             | <2 y (IP)                     | 1.7 (13/741)                 |
| Asia, East                                      |                                             |                               |                              |

\* IP- In-patient

† PICU- Pediatric Intensive Care Unit

| Location (Reference)                                                 | Study period; no. of RSV seasons             | Subjects: age group (setting) | RSV case fatality rate % (N) |
|----------------------------------------------------------------------|----------------------------------------------|-------------------------------|------------------------------|
| Eastern and Northern New Territories, Hong Kong, China <sup>33</sup> | January 1993 - December 1997; 5 RSV seasons  | <5 y (IP)                     | 0.2 (2/1340)                 |
| Hong Kong, China <sup>65</sup>                                       | January 2003 - April 2007                    | <5 y (PICU)                   | 5.9 (1/17)                   |
| <b>Australasia</b>                                                   |                                              |                               |                              |
| Sydney, Australia <sup>66</sup>                                      | May 1997 - October 1999; 3 RSV seasons       | <2 y (IP)                     | 0.3 (1/342)                  |
| Townsville (Queensland), Australia <sup>34</sup>                     | January 1997 - October 1999                  | <1 y (IP)                     | 1.1 (1/88)                   |
| <b>North America, High Income</b>                                    |                                              |                               |                              |
| Navajo and White Mountain Apache, USA <sup>67</sup>                  | October 1997-March 2000; 3 RSV seasons       | <2 y (IP)                     | 0.1 (1/876)                  |
| Alaska, USA (Singleton et al.)                                       | July 2001 - June 2004; 3 RSV seasons         | <3 y (IP)                     | 0.4 (1/268)                  |
| <b>Latin America, Southern</b>                                       |                                              |                               |                              |
| Multicentric, Argentina <sup>68</sup>                                | April 1993 - December 1994; 2 RSV seasons    | <5 y (IP)                     | 1.3 (4/312)                  |
| Santiago, Chile <sup>69</sup>                                        | January 1989 - December 2000; 12 RSV seasons | <2 y (IP)                     | 0.1 (1/1337)                 |
| Buenos Aires, Argentina <sup>70</sup>                                | May 1991 - December 1992; 1 season           | <2 y (IP)                     | 0 (0/61)                     |
| <b>Latin America, Tropical</b>                                       |                                              |                               |                              |
| Sao Paulo, Brazil <sup>71</sup>                                      | March 1995 - August 1996; 2 RSV seasons      | <5 y (IP)                     | 0 (0/100)                    |
| Porto Alegre, Brazil <sup>72</sup>                                   | June 1996 - December 1996                    | <5 y (PICU)                   | 2.8 (2/71)                   |
| <b>Latin America, Central</b>                                        |                                              |                               |                              |
| Tlaxcala, Mexico <sup>73</sup>                                       | October 1994 - June 1995                     | <5 y (IP)                     | 0 (0/24)                     |
| San Marcos, Guatemala (Bruce et al.)                                 | December 2002 - November 2004; 2 RSV seasons | <18 months (OP) <sup>‡</sup>  | 0 (0/86)                     |

---

<sup>‡</sup> IP- In-patient

**Supplementary table 8: Hypoxemia in under-5 children hospitalised with RSV-ALRI**

| Study site (Reference)                                   | Proportion of RSV+ with hypoxemia |
|----------------------------------------------------------|-----------------------------------|
| Kilifi hospital study, Kenya (Nokes et al.) <sup>§</sup> | 0.09                              |
| Lombok, Indonesia (Gessner et al.)                       | 0.18                              |
| Alaska, USA (Singleton et al.) <sup>**</sup>             | 0.36                              |
| Navajo, USA (Epi study)                                  | 0.50                              |
| San Marcos, Guatemala (Bruce et al.) <sup>††</sup>       | 0.66                              |
| Athens, Greece <sup>57</sup>                             | 0.64                              |
| Freiburg, Germany <sup>59</sup>                          | 0.54                              |
| Western Region, The Gambia <sup>29</sup>                 | 0.16                              |
| Soweto, South Africa (Madhi et al.)                      | 0.23                              |

---

<sup>§</sup> The cut-off for hypoxemia was taken as SaO<sub>2</sub> <90% for all age groups (including neonates)

<sup>\*\*</sup> For the period 1993-1996. The cut-off for hypoxemia was taken as SaO<sub>2</sub> <90% for all age groups (including neonates)

<sup>††</sup> Pulse oximetry was done at community centres not more than 1 km away from the homes by the study physicians. Only three children were hospitalised. The cut-off for hypoxemia was taken as SaO<sub>2</sub> <87% for all age groups (including neonates).

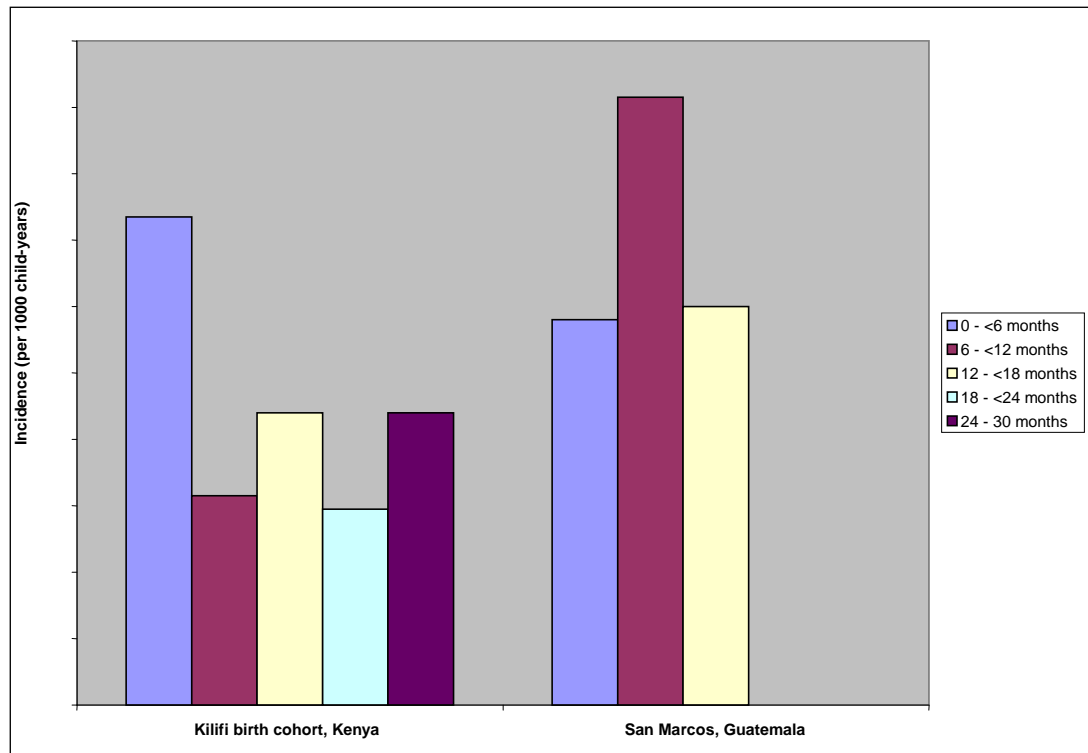

**Supplementary Figure 1: Incidence of RSV-ALRI (per 1000 child-years of observation) among children aged 0 – 30 months from community based active ascertainment studies in Kenya and Guatemala, by age group**



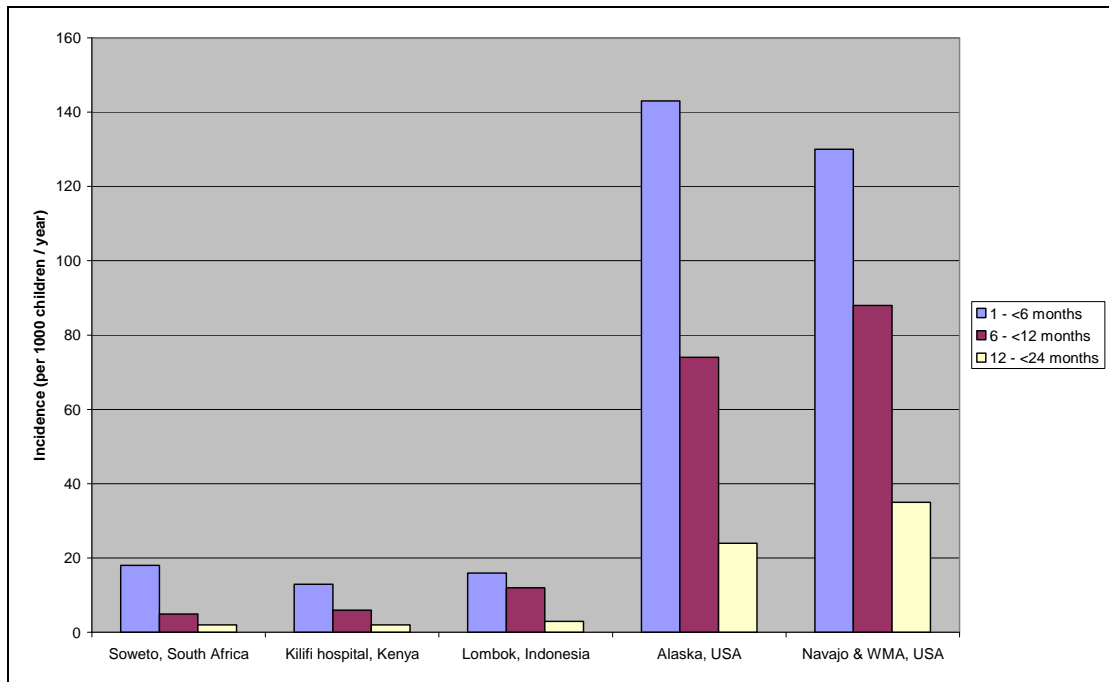

**Supplementary Figure 2: Incidence of RSV-severe ALRI (per 1000 child-years of observation) among hospitalised children <2 years in Kenya, Indonesia, South Africa & indigenous USA populations, by age group**

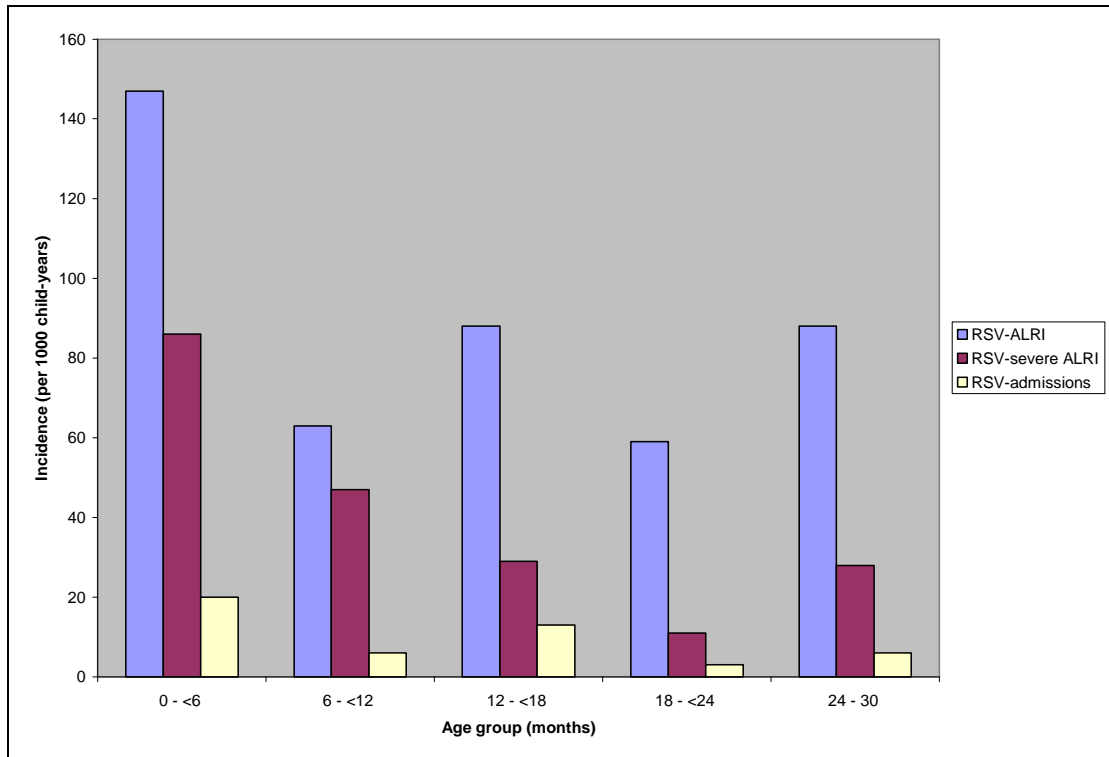

**Supplementary Figure 3: Incidence of RSV-ALRI among children (0-30 months) in Kilifi, Kenya by age group and case definition**

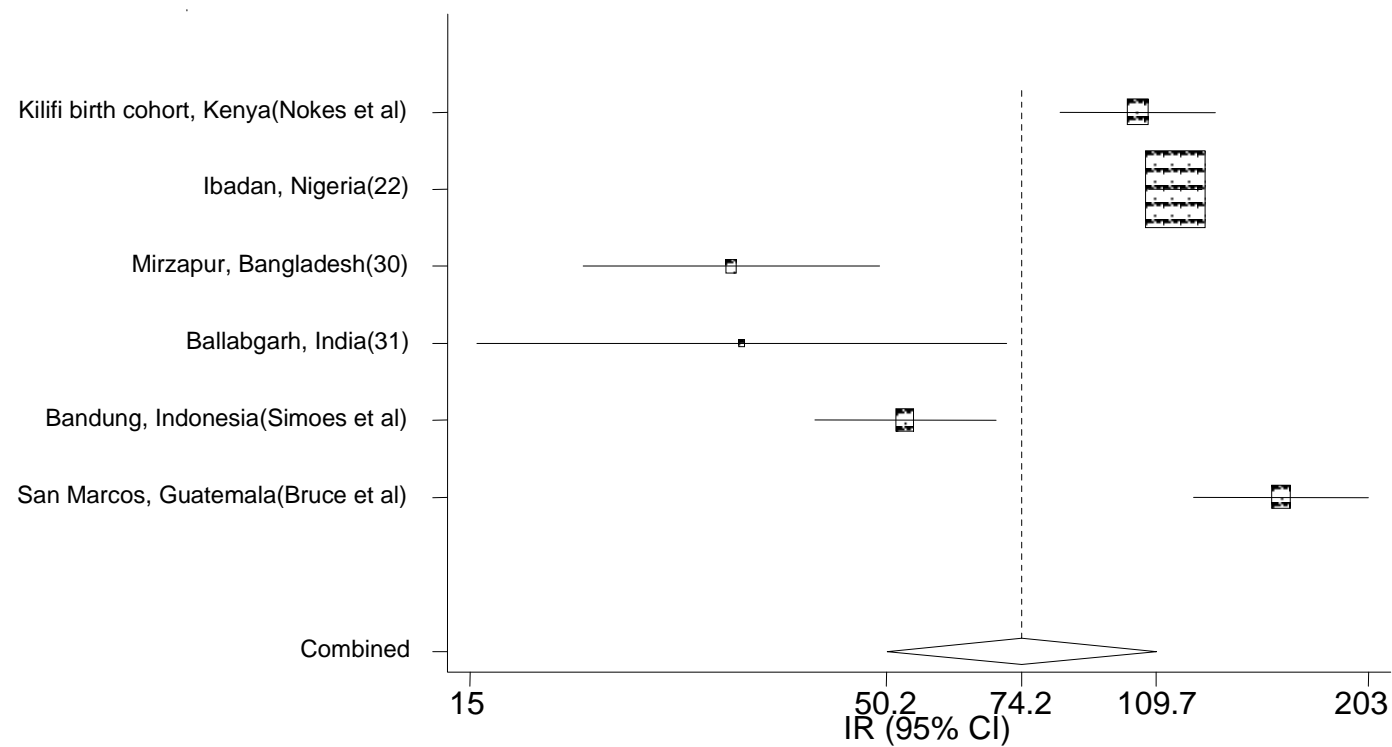

**Supplementary figure 4: Meta-analysis of incidence rates (per 1000 children / year) of RSV-ALRI in active case ascertainment studies in developing countries for children 0-1 year old. The size of each box indicates the size of the corresponding study; the diamond represents the meta-estimate with its 95% CI.**

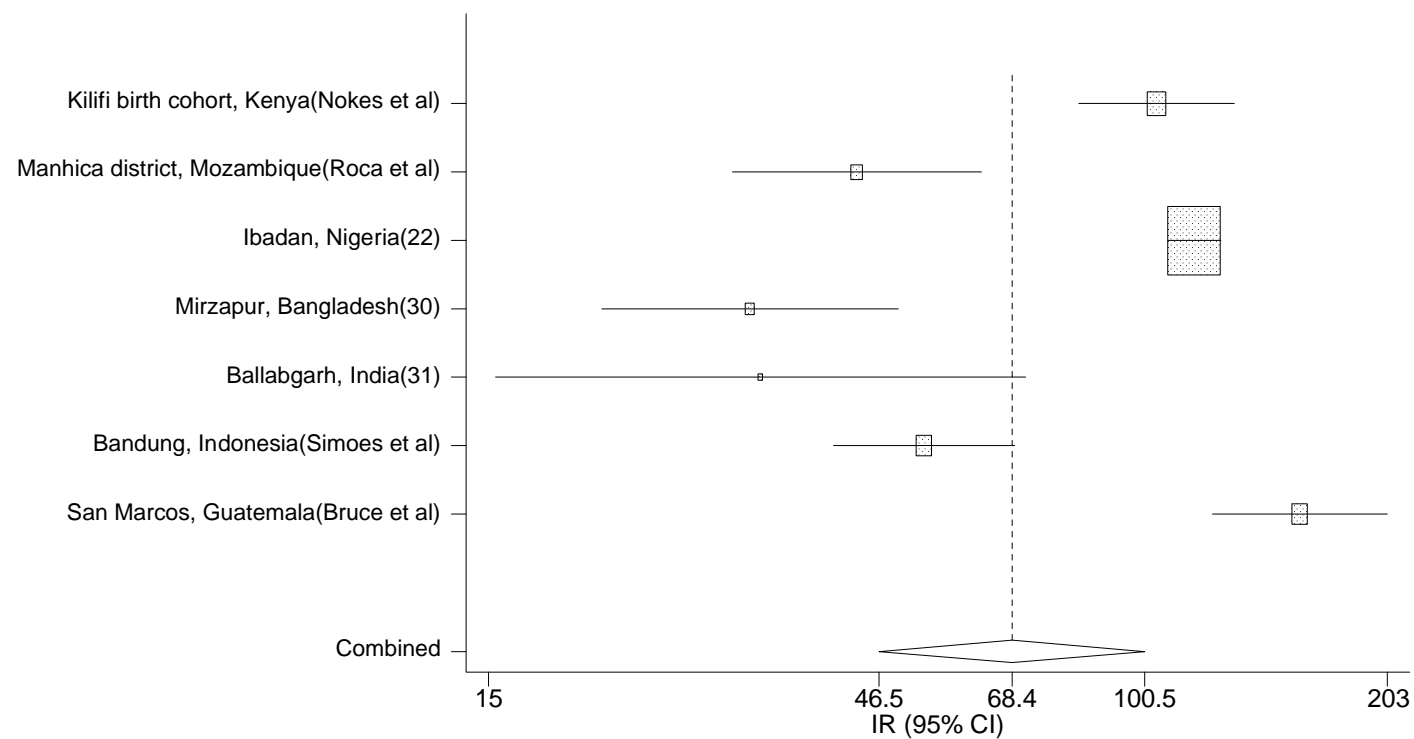

**Supplementary figure 5: Meta-analysis of incidence rates (per 1000 children / year ) of RSV-ALRI in active and passive case ascertainment studies in developing countries for children 0-<1 year old. The size of each box indicates the size of the corresponding study; the diamond represents the meta-estimate with its 95% CI.**

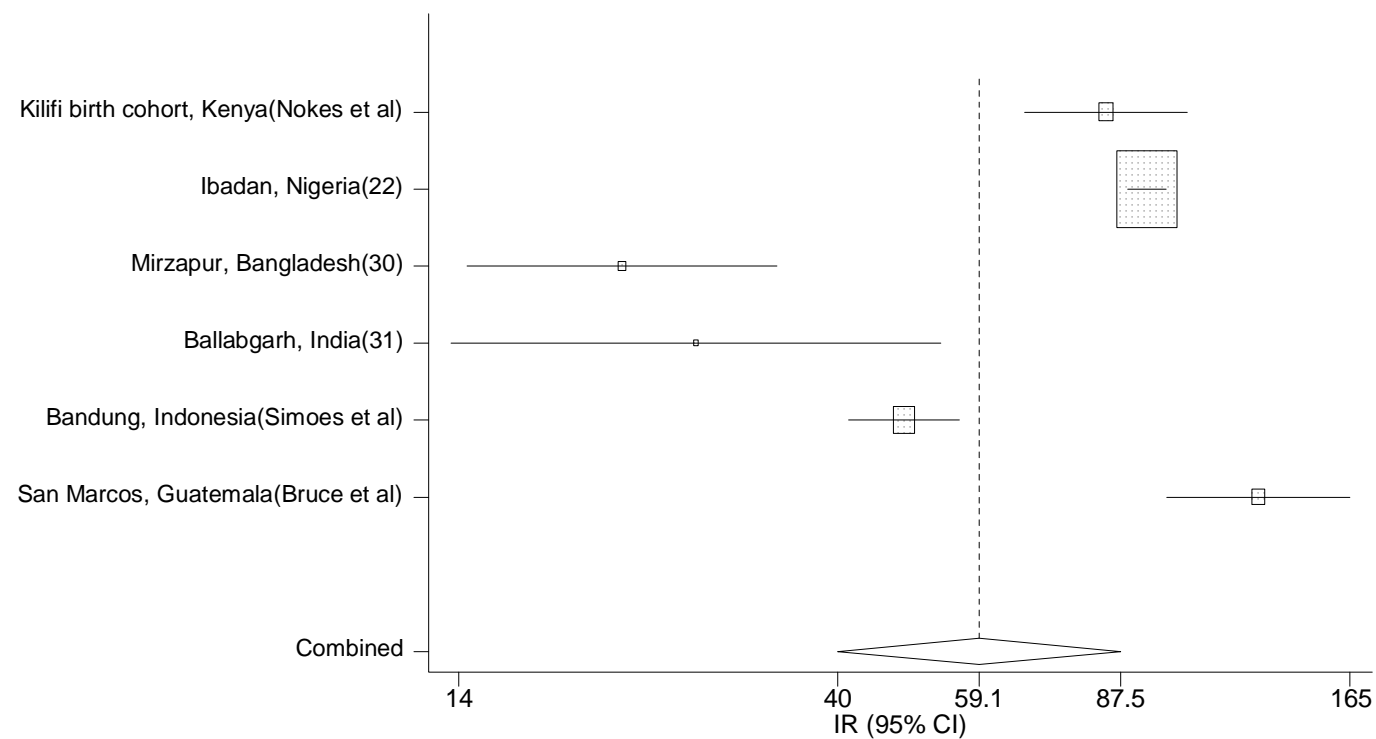

**Supplementary figure 6: Meta-analysis of incidence rates (per 1000 children / year ) of RSV-ALRI in active case ascertainment studies in developing countries for children 0-<5 year old. The size of each box indicates the size of the corresponding study; the diamond represents the meta-estimate with its 95% CI.**

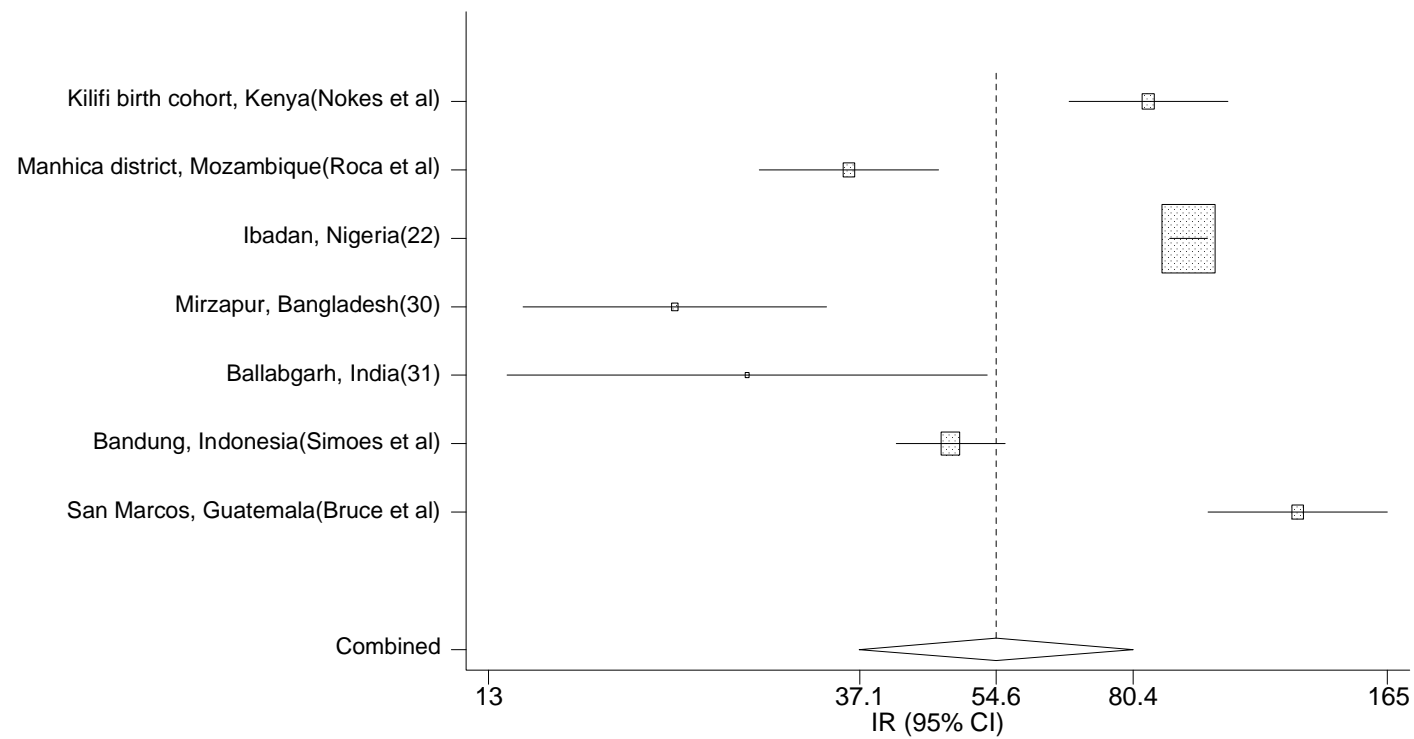

**Supplementary figure 7: Meta-analysis of incidence rates (per 1000 children / year ) of RSV-ALRI in active and passive case ascertainment studies in developing countries for children 0-<5 year old. The size of each box indicates the size of the corresponding study; the diamond represents the meta-estimate with its 95% CI.**

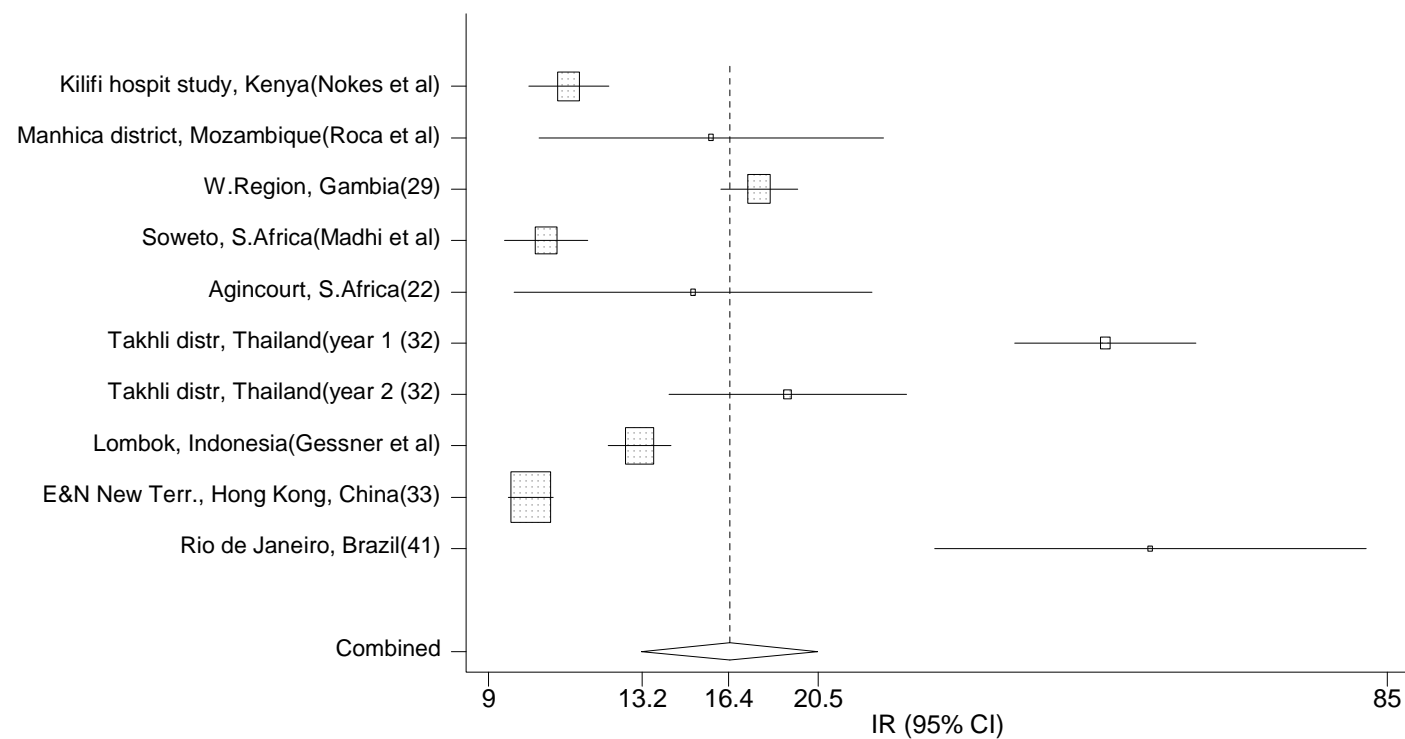

**Supplementary figure 8: Meta-analysis of incidence rates (per 1000 children / year ) of RSV-severe ALRI in passive case ascertainment studies in developing countries for children 0-<1 year old. The size of each box indicates the size of the corresponding study; the diamond represents the meta-estimate with its 95% CI.**

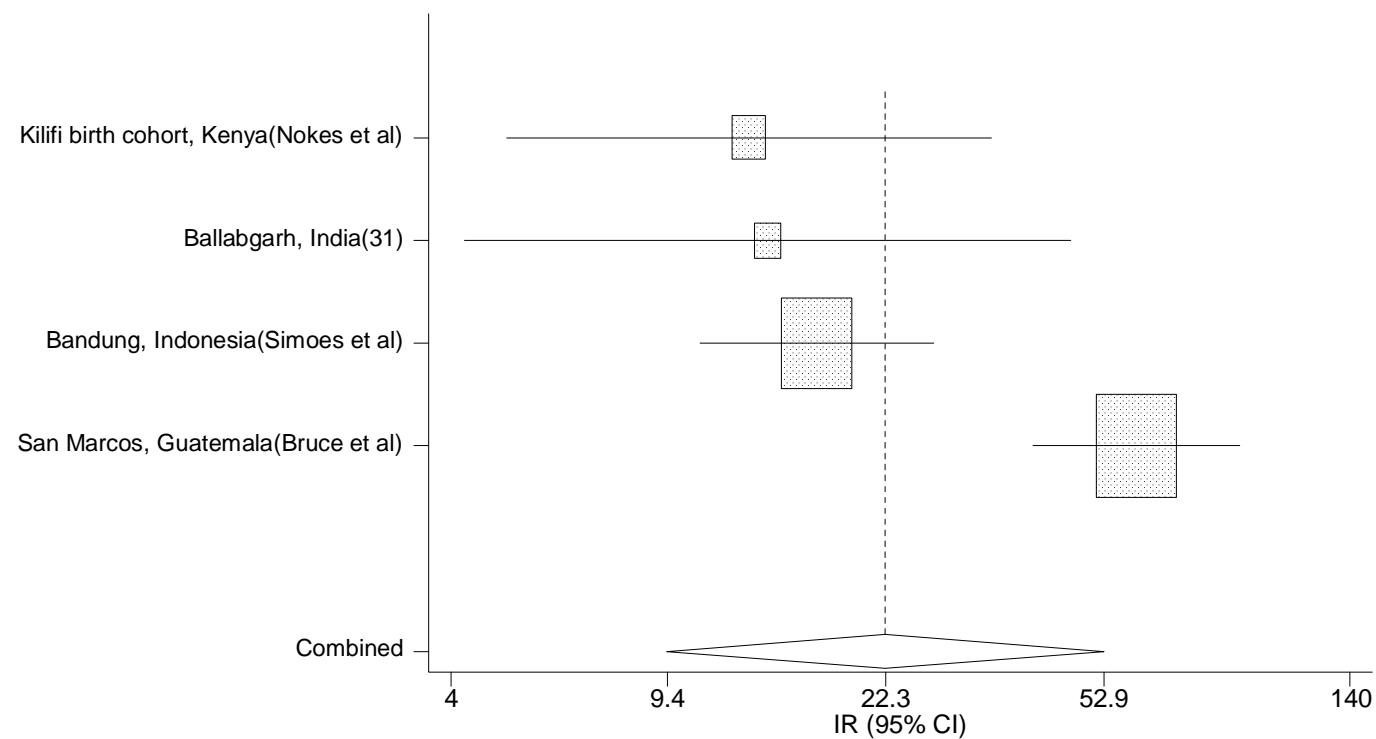

**Supplementary figure 9: Meta-analysis of incidence rates (per 1000 children / year ) of RSV-severe ALRI in active case ascertainment studies in developing countries for children 0-<1 year old. The size of each box indicates the size of the corresponding study; the diamond represents the meta-estimate with its 95% CI.**



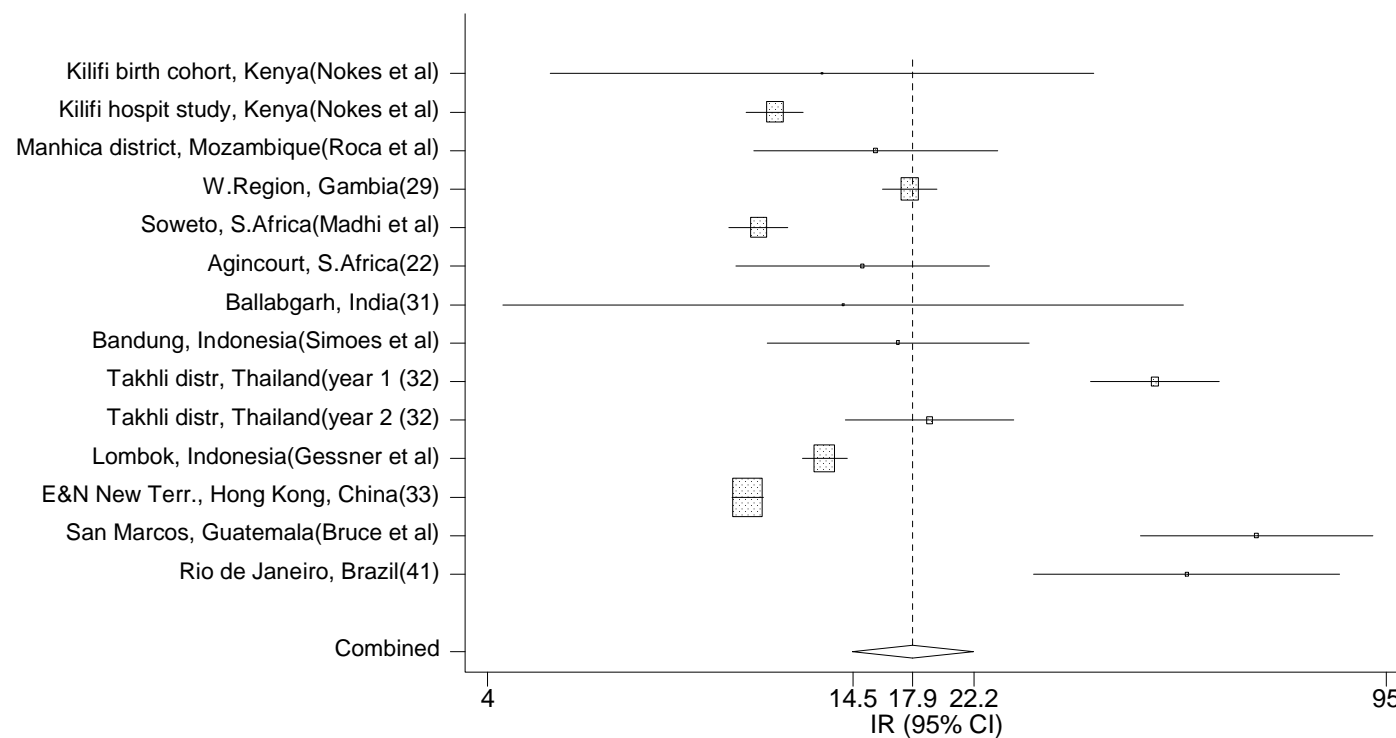

**Supplementary figure 10: Meta-analysis of incidence rates (per 1000 children / year ) of RSV-severe ALRI in passive and active case ascertainment studies in developing countries for children 0-<1 year old. The size of each box indicates the size of the corresponding study; the diamond represents the meta-estimate with its 95% CI.**

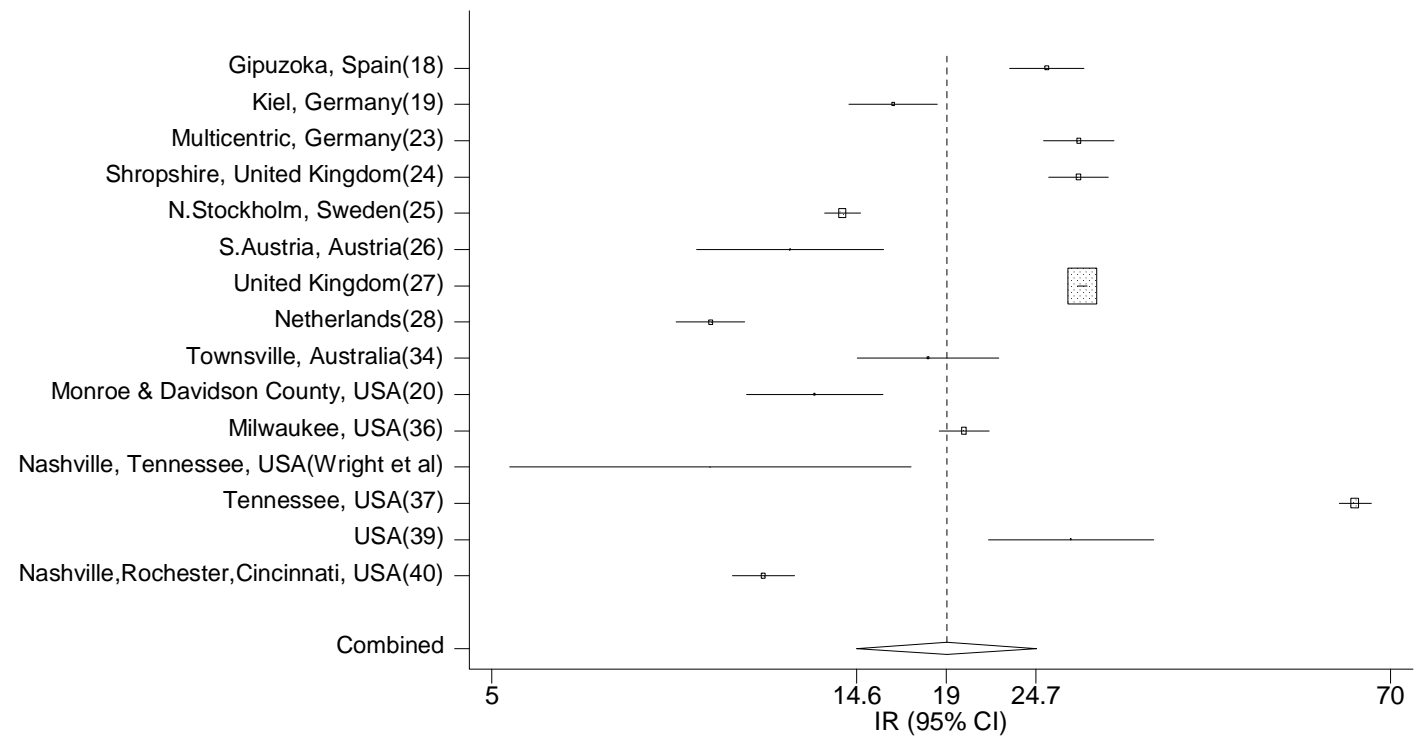

**Supplementary figure 11: Meta-analysis of incidence rates (per 1000 children / year ) of RSV-severe ALRI in passive case ascertainment studies in industrialised countries for children 0-<1 year old. The size of each box indicates the size of the corresponding study; the diamond represents the meta-estimate with its 95% CI.**

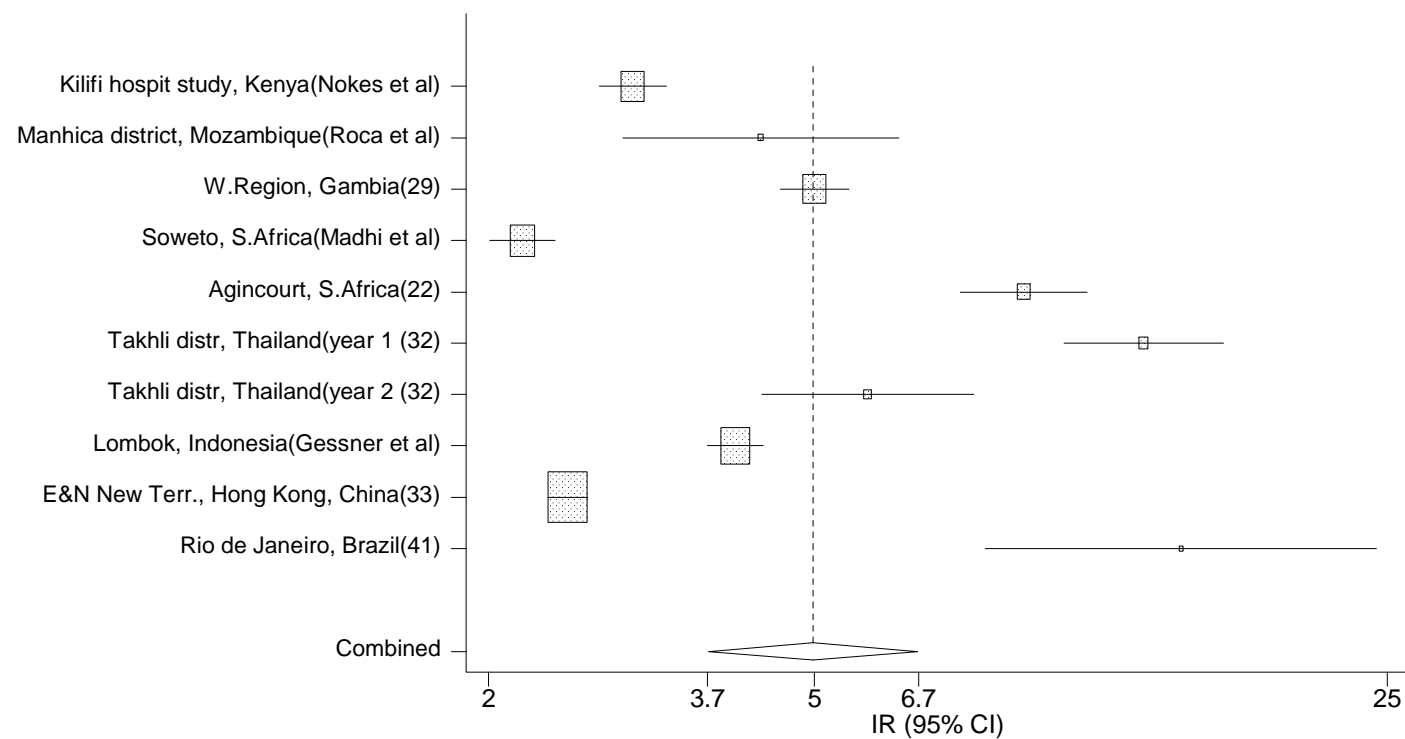

**Supplementary figure 12: Meta-analysis of incidence rates (per 1000 children / year ) of RSV-severe ALRI in passive case ascertainment studies in developing countries for children 0-<5 year old. The size of each box indicates the size of the corresponding study; the diamond represents the meta-estimate with its 95% CI.**

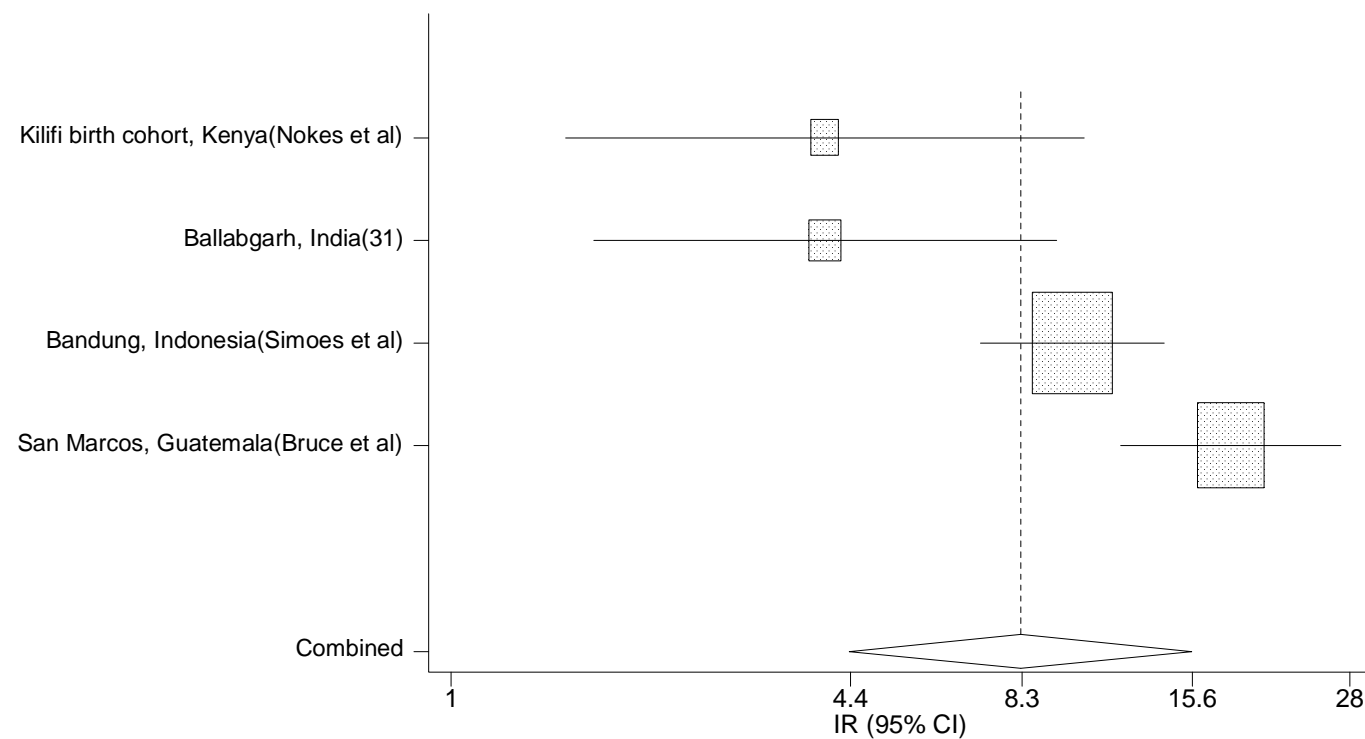

**Supplementary figure 13: Meta-analysis of incidence rates (per 1000 children / year ) of RSV-severe ALRI in active case ascertainment studies in developing countries for children 0-<5 year old. The size of each box indicates the size of the corresponding study; the diamond represents the meta-estimate with its 95% CI.**

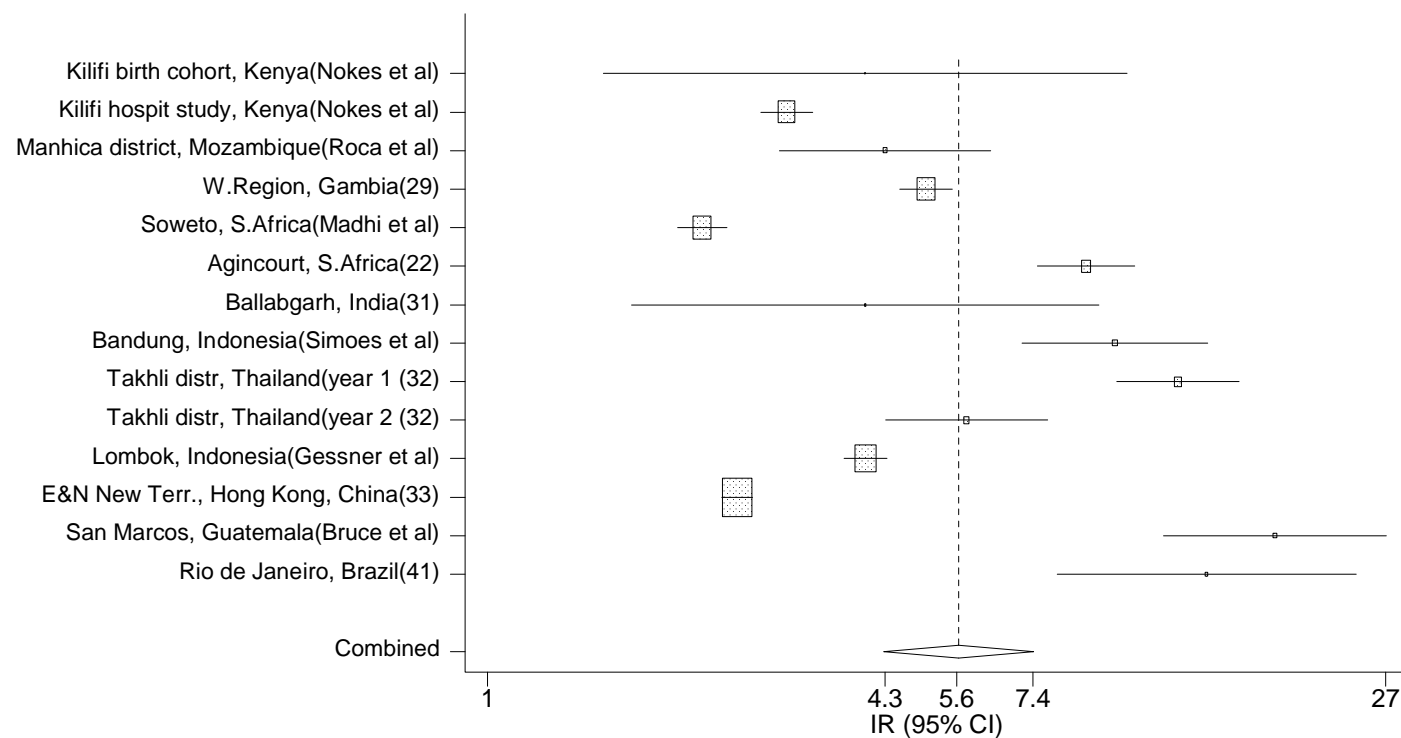

**Supplementary figure 14: Meta-analysis of incidence rates (per 1000 children / year ) of RSV-severe ALRI in passive and active case ascertainment studies in developing countries for children 0-<5 year old. The size of each box indicates the size of the corresponding study; the diamond represents the meta-estimate with its 95% CI.**

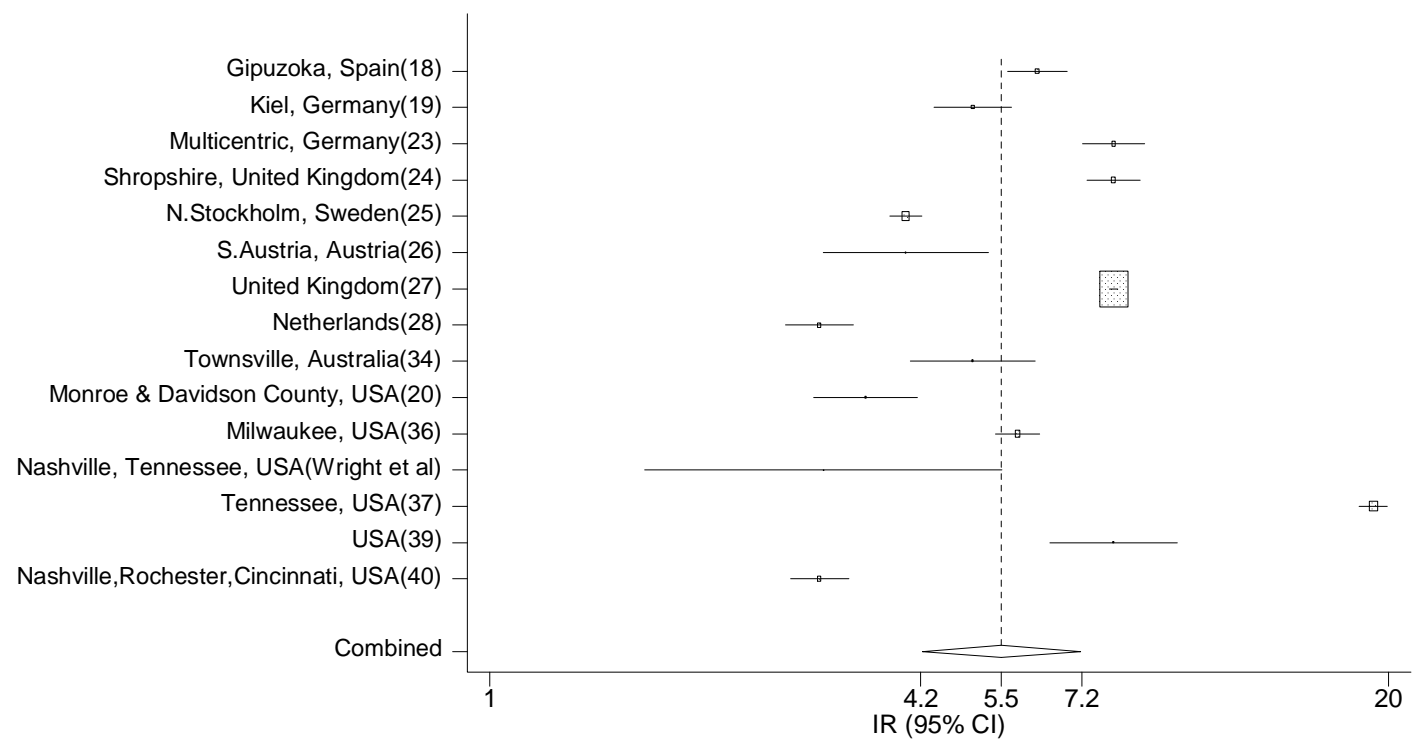

**Supplementary figure 15: Meta-analysis of incidence rates (per 1000 children / year ) of RSV-severe ALRI in passive case ascertainment studies in industrialised countries for children 0-<5 year old. The size of each box indicates the size of the corresponding study; the diamond represents the meta-estimate with its 95% CI.**

## References

1. Bryce J, Boschi-Pinto C, Shibuya K, Black RE, WHO Child Health Epidemiology Reference Group. WHO estimates of the causes of death in children. *Lancet*. 2005;365(9465):1147-52.
2. Rudan I, Boschi-Pinto C, Biloglav Z, Mulholland EK, Campbell H. Epidemiology and etiology of clinical pneumonia. *Bull World Health Organ*. 2008;86:408-16.
3. Wright PF, Cutts FT. Generic protocol to examine the incidence of lower respiratory infection due to respiratory syncytial virus in children less than 5 years of age. Geneva: World Health Organization; 2000. p. 34.
4. Weber MW, Mulholland EK, Greenwood BM. Respiratory syncytial virus infection in tropical and developing countries. *Trop Med Int Health*. 1998 Apr;3(4):268-80.
5. Simoes EA. Respiratory syncytial virus infection. *Lancet*. 1999;354:847-52.
6. Nokes DJ. Respiratory Syncytial Virus Disease Burden in the Developing World. Cane P, ed. Amsterdam: Elsevier; 2007.
7. Law BJ, Carbonell-Estrany X, Simoes EAF. An update on respiratory syncytial virus epidemiology: a developed country perspective. *Respir Med*. 2002;96 (Suppl B):S1-7.
8. Karron RA, Wright PF, Belshe RB, Thumar B, Casey R, Newman F, et al. Identification of a Recombinant Live Attenuated Respiratory Syncytial Virus Vaccine Candidate That Is Highly Attenuated in Infants. *J Infect Dis*. 2005;191(7):1093-104.
9. Schickli JH, Dubovsky F, Tang RS. Challenges in developing a pediatric RSV vaccine. *Hum Vaccin*. 2009 Sep;5(9):582-91. .
10. Gomez M, Mufson MA, Dubovsky F, Knightly C, Zeng W, Losonsky G. Phase-I Study Medi-534, of A Live, Attenuated Intranasal Vaccine Against Respiratory Syncytial Virus and Parainfluenza-3 Virus in Seropositive Children. *Pediatr Inf Dis J*. 2009;28(7):655-8
11. W.H.O. Technical bases for the WHO recommendations on the management of pneumonia in children at first-level health facilities. Geneva: World Health Organization; 1991.
12. Burton GG, Hodgkin JE, Ward JJ. Respiratory Care. A Guide to Clinical Practice. 4th Edition. 4th ed. Philadelphia: Lipincott; 1997.
13. Mullins JA, Lamonte AC, Bresee JS, Anderson LJ. Substantial variability in community respiratory syncytial virus season timing. *Pediatr Inf Dis J*. 2003 Oct;22(10):857-62.
14. UNICEF. State of the World's Children 2007. New York: United Nation's Children's Fund; 2007. <http://www.unicef.org/sowc07/docs/sowc07.pdf> (accessed July 5, 2008).
15. Rudan I, Tomaskovic L, Boschi-Pinto C, Campbell H. Global estimate of clinical pneumonia among children under 5 years of age. *Bull World Health Organ*. 2004;82:895-903.
16. Djelantik IG, Gessner B.D., Sutanto A., Steinhoff M., Linehan M., Moulton L.H., Arjoso S. Case Fatality Proportions and Predictive Factors for Mortality among Children Hospitalised with Severe Pneumonia in a Rural Developing Country Setting. *J Trop Pediatr*. 2003;49(6):327-32.
17. Onyango FE, Steinhoff M, Wafula EM, Wariua S, Musia J, Kitonyi J. Hypoxaemia in young Kenyan children with acute lower respiratory infection. *BMJ*. 1993;306:612-15.
18. Vicente D, Montes M, Cilla G, Perez-Yarza EG, Perez-Trallero E. Hospitalization for respiratory syncytial virus in the paediatric population in Spain. *Epidemiol Infect*. 2003;131(2):867-72.
19. Weigl JA, Puppe W, Rockahr S, Schmitt HJ. Burden of disease in hospitalized RSV-positive children in Germany. *Klinische Padiatrie*. 2002;214(6):334-42.
20. Iwane MK, Edwards KM, Szilagyi PG, Walker FJ, Griffin MR, Weinberg GA, et al. Population-based surveillance for hospitalizations associated with respiratory syncytial virus, influenza virus, and parainfluenza viruses among young children. *Pediatrics*. 2004;113(6 Part 1):1758-64.
21. Yorita KL, Holman RC, Steiner CA, Effler PV, Miyamura J, Forbes S, et al. Severe bronchiolitis and respiratory syncytial virus among young children in Hawaii. *Pediatr Inf Dis J*. 2007 Dec;26(12):1081-8.
22. Robertson SE, Roca A, Alonso P, Simoes EA, Kartasasmita CB, Olaleye DO, et al. Respiratory syncytial virus infection: denominator-based studies in Indonesia, Mozambique, Nigeria and South Africa. *Bull World Health Organ*. 2004;82(12):914-22.
23. Forster J, Ihorsst G, Rieger CHL, Stephan V, Frank H, Gurth H, et al. Prospective population-based study of viral lower respiratory tract infections in children under 3 years of age (the PRI.DE study). *Eur J Pediatr*. 2004;163:709-16.

24. Deshpande SA, Northern V. The clinical and health economic burden of respiratory syncytial virus disease among children under 2 years of age in a defined geographical area. *Arch Dis Child*. 2003;88:1065-9.
25. Eriksson M, Bennet R, Rotzen-Ostlund M, Sydow von M, Wirgart BZ. Population-based rates of severe respiratory syncytial virus infection in children with and without risk factors, and outcome in a tertiary care setting. *Acta Paediatr*. 2002;91:593-8.
26. Resch B, Gusenleitner W, Muller W. The Impact of Respiratory Syncytial Virus Infection: A Prospective Study in Hospitalised Infants Younger than 2 Years. *Infection*. 2002;4:193-7.
27. Muller-Pebody B, Edmunds WJ, Zambon MC, Gay NJ, Crowcroft NS. Contribution of RSV to Bronchiolitis and Pneumonia-Associated Hospitalisations in English Children, April 1995-March 1998. *Epidemiol Infect*. 2002;129(1):99-106.
28. Jansen AG, Sanders EA, Hoes AW, van Loon AM, Hak E. Influenza- and respiratory syncytial virus-associated mortality and hospitalisations. *Eur Respir J*. 2007 Dec;30(6):1158-66.
29. Weber MW, Milligan P, Sanneh M, Awemoyi A, Dakour R, Schneider G, et al. An epidemiological study of RSV infection in the Gambia. *Bull World Health Organ*. 2002;80:562-8.
30. Hasan K, Jolly P, Marquis G, Roy E, Podder G, Alam K, et al. Viral Etiology of pneumonia in a cohort of newborns till 24 months of age in Rural Mirzapur, Bangladesh. *Scand J Infect Dis*. 2006;38:690-5.
31. Broor S, Parveen S, Bharaj P, Prasad VS, Srinivasulu KN, al. e. A prospective three year cohort study of the Epidemiology and Virology of Acute Respiratory Infections in Rural India. *PLoS ONE*. 2007;2(6).
32. Suwanjutha S, Sunakorn P, Chantarojanasiri T, Siritantikorn S, Nawanoparatkul S, Bhuket TRN, et al. Respiratory Syncytial Virus- Associated Lower Respiratory Tract Infection in under-5-year old children in a Rural Community of Central Thailand, a Population-Based Study. *J Med Assoc Thai*. 2002;85(Suppl 4):S1111-S9.
33. Chan PKS, Sung RYT, Fung KSC, Hui M, Chik KW, Adeyemi-Doro FAB, et al. Epidemiology of respiratory syncytial virus infection among pediatric patients in Hong Kong: seasonality and disease impact. *Epidemiol Infect*. 1999;123:257-62.
34. Whitehall JS, Boilsetty S, Whitehall P, Francis F, Norton R, Patole SK. High Rate of Indigenous Bronchiolitis and Palivizumab. *J Paediatr Child Health*. 2001;37(4):416-7.
35. Singleton RJ, Bruden D, Bulkow L. Respiratory Syncytial Virus Season and Hospitalizations in Alaskan Yukon-Kuskokwim Delta. *Pediatr Inf Dis J*. 2007;26(11):S1-S6.
36. Henrickson KJ, Hoover S, Kehl KS, Hua W. National disease burden of respiratory viruses detected in children by polymerase chain reaction. *Pediatr Inf Dis J*. 2004;23(Suppl 1):S11-8.
37. Boyce TG, Mellen BG, Mitchel EF, Jr., Wright PF, Griffin MR. Rates of hospitalization for respiratory syncytial virus infection among children in Medicaid. *J Pediatr*. 2000;137(6):865-70.
38. Leader S, Kohlhasse K. Recent trends in severe respiratory syncytial virus (RSV) among US infants, 1997 to 2000. *J Pediatr*. 2003 Nov;143(5 Suppl):S127-32.
39. Holman RC, Curns AT, Cheek JE, Breese JS, Singleton RJ, Carver K, et al. Respiratory Syncytial Virus Hospitalizations Among American Indian and Alaska Native Infants and the General United States Infant Population. *Pediatrics*. 2004;114:437-44.
40. Hall CB, Weinberg GA, Iwane MK, Blumkin AK, Edwards KM, Staat MA, et al. The Burden of Respiratory Virus Infection in Young Children. *N Engl J Med*. 2009;360(6):588-98.
41. Suttmoller F, Ferro ZPA, Asensi MD, Ferreira V, Mazzei IS, Cunha BL. Etiology of Acute Respiratory Tract Infections Among Children in a Combined Community and Hospital Study in Rio de Janeiro. *Clin Infect Dis*. 1995;20:854-60.
42. Bruce N, Weber M, Arana B, Diaz A, Jenny A, Thompson L, et al. Pneumonia case-finding in the RESPIRE Guatemala indoor air pollution trial: standardizing methods for resource-poor settings. *Bull World Health Organ*. 2007;85(7):535-44.
43. O'Brien KL, Wolfson LJ, Watt JP, Henkle E, Deloria-Knoll M, McCall N, et al. Burden of disease caused by *Streptococcus pneumoniae* in children younger than 5 years: global estimates. *Lancet*. 2009;374(9693):893-902.
44. Watt JP, Wolfson LJ, O'Brien KL, Henkle E, Deloria-Knoll M, McCall N, et al. Burden of disease caused by *Haemophilus influenzae* type b in children younger than 5 years: global estimates. *Lancet*. 2009;374(9693):903-11.



45. Sutanto A, Gessner BD, Djelantik GG, Steinhoff M, Murphy H, Nelson C, et al. Acute Respiratory Illness Incidence and Death among Children under two years of age on Lombok Island, Indonesia. *Am J Trop Med Hyg.* 2002;66(2):175-9.
46. Nokes DJ, Ngama MJ, Bett A, Abwao J, Munywoki P, English M, et al. Incidence and severity of respiratory syncytial virus pneumonia in rural Kenyan children identified through hospital surveillance. *Clin Infect Dis.* 2009;49(9):1341-9.
47. Nokes DJ, Okiro EA, Ngama M, Ochola R, White LJ, Scott PD, et al. Respiratory Syncytial Virus Infection and Disease in Infants and Young Children observed from Birth in Kilifi District, Kenya. *Clin Infect Dis.* 2008;46:50-7.
48. Henrickson KJ, Hall CB. Diagnostic assays for respiratory syncytial virus disease. *Pediatr Inf Dis J.* 2007 Nov;26(11):S36-S40.
49. Weber M, Dackour R, Usen S, Schneider G, Adegbola RA, Cane P, et al. The clinical spectrum of respiratory syncytial virus disease in the Gambia. *Pediatr Inf Dis J.* 1998;17(3):224-30.
50. Madhi SA, Ludewick H, Kuwanda L, van Niekerk N, Cutland C, Klugman KP. Seasonality, incidence, and repeat human metapneumovirus lower respiratory tract infections in an area with a high prevalence of human immunodeficiency virus type-1 infection. *Pediatr Infect Dis J.* 2007 Aug;26(8):693-9.
51. Hamelin M-E, Abed Y, Boivin G. Human Metapneumovirus: A New Player among Respiratory Viruses. *Clin Infect Dis.* 2004;38(7):983-90.
52. Wolf DG, Greenberg D, Kalkstein D, Shemer-Avni Y, Givon-Lavi N, Saleh N, et al. Comparison of human metapneumovirus, respiratory syncytial virus and influenza-A virus lower respiratory tract infection in hospitalised young children. *Pediatr Inf Dis J.* 2006;25(4):320-4.
53. Foulongne V, Guyon G, Rodiere M, Segondy M. Human metapneumovirus infection in young children hospitalized with respiratory tract disease. *Pediatr Inf Dis J.* 2006 Apr;25(4):354-9.
54. Duke T, Wandt F, Jonathan M, Matai S, Kaupa M, Saavu M, et al. Improved oxygen systems for childhood pneumonia: a multihospital effectiveness study in Papua New Guinea. *Lancet.* 2008;372:1328-33.
55. Simoes EAF, Groothuis JR. Respiratory syncytial virus prophylaxis- the story so far. *Respir Med.* 2002;96(Suppl. B):S15-S24.
56. Strutton DR, Stang PE. Prophylaxis against respiratory syncytial virus (RSV), varicella, and pneumococcal infections: economic-based decision-making. *J Pediatr.* 2003;143(5):S157-62.
57. Tsolia MN, Kafetzis D, Danelatou K, Astra H, Kallergi K, Spyridis P, et al. Epidemiology of Respiratory Syncytial Virus Bronchiolitis in hospitalised infants in Greece. *Eur J Epidemiol.* 2003;18(1):55-61.
58. Duppenhaler A, Gorgievski-Hrisoho M, Frey U, Aebi C. Two-Year Periodicity of Respiratory Syncytial Virus Epidemics in Switzerland. *Infection.* 2003;2:75-80.
59. Berner R, Schwoerer F, Schumacher RF, Meder M, Forster J. Community and nosocomially acquired respiratory syncytial virus infection in a German paediatric Hospital from 1988 to 1999. *Eur J Pediatr.* 2001;160:541-7.
60. Simon A, Ammann RA, Wilkesmann A, Eis-Hubinger AM, Schildgen O, Weimann E, et al. Respiratory syncytial virus infection in 406 hospitalised premature infants: results from a prospective multicentre database. *Eur J Pediatr.* 2007;166:1273-83.
61. Prais D, Schonfeld T, Amir J. Admission to the intensive care unit for respiratory syncytial virus bronchiolitis: a national survey before palivizumab use. *Pediatrics.* 2003;112(3):548-52.
62. Loscertales MP, Roca A, Ventura P, Abacassamo F, Santos FD, Sitaube M, et al. Epidemiology and clinical presentation of respiratory syncytial virus infection in a rural area of southern Mozambique. *Pediatr Inf Dis J.* 2002;21:148-55.
63. Hussey GD, Apolles P, Arendse Z, Yeates J, Robertson A, Swinger G, et al. Respiratory syncytial virus infection in children hospitalised with acute lower respiratory tract infection. *S Afr Med J.* 2000 May;90(5):509-12.
64. Delport SD, Brisley T. Aetiology and outcome of severe community-acquired pneumonia in children admitted to a paediatric intensive care unit. *S Afr Med J.* 2002 Nov;92(11):907-11.
65. Hon KL, Hung E, Tang J, Chow CM, Leung TF, Cheung KL, et al. Premorbid factors and outcome associated with respiratory virus infections in a pediatric intensive care unit. *Pediatr Pulmonol.* 2008 Mar;43(3):275-80.

66. Numa A. Outcome of respiratory syncytial virus infection and a cost-benefit analysis of prophylaxis. *J Paediatr Child Health*. 2000;36:422-7.
67. Bockova J, O'Brien KL, Oski J, Croll J, Reid R, Weatherholtz RC, et al. Respiratory Syncytial Virus Infection in Navajo and White Mountain Apache Children. *Pediatrics*. 2002;110:20-6.
68. Carballal G, Videla C, Espinosa MJ, Savy V, Uez O, Sequeira MD, et al. Multicentered Study of Viral Acute Lower Respiratory Infections in Children from Four Cities of Argentina, 1993-1994. *J Med Virol*. 2001;64:167-74.
69. Avendano LF, Palomino MA, Larranaga C. Surveillance for Respiratory Syncytial Virus in Infants Hospitalized for Acute Lower Respiratory Infection in Chile (1989 to 2000). *J Clin Microbiol*. 2003;41(10):4879-82.
70. Videla C, Carballal G, Misirlian A, Aguilar M. Acute lower respiratory infections due to respiratory syncytial virus and adenovirus among hospitalized children from Argentina. *Clin Diagn Virol*. 1998;10(1):17-23.
71. Vieira RA, Stewien KE, Queiroz DA, Duringon EL, Torok TJ, Anderson LJ, et al. Clinical Patterns and Seasonal Trends in Respiratory Syncytial Virus Hospitalisations in Sao Paulo, Brazil. *Rev Inst Med Trop Sao Paulo*. 2001;43(3):125-31.
72. Straliootto SM, Siqueira MM, Machado V, Maia TMR. Respiratory viruses in the pediatric intensive care unit: prevalence and clinical aspects. *Memorias do Instituto Oswaldo Cruz*. 2004 Dec;99(8):883-7.
73. Miranda-Novales G, Solorzano-Santos F, Leanos-Miranda B, Vazquez-Rosales G, Palafox-Torres M, Guiscafne-Gallardo H. Blood culture and respiratory syncytial virus identification in acute lower respiratory tract infection. *Indian J Pediatr*. 1999 Nov-Dec;66(6):831-6.

## Glossary

**Incidence:** “The number of new health-related events in a defined population within a specified period of time” (ref. Porta, M. (Ed.) (2008) *A Dictionary of Epidemiology*, New York, Oxford University Press)

**Burden of disease:** This indicates the impact of disease in a population. The GBD methodology enable the combined measurement of mortality and non-fatal health outcomes

**Incidence Rate Ratio:** This is defined as the “incidence rate in the exposed group divided by the incidence rate in the unexposed group” (ref. Porta, M. (Ed.) (2008) *A Dictionary of Epidemiology*, New York, Oxford University Press).

**Case Fatality Ratio:** This refers to the proportion of cases of a specified condition that are fatal within a specified time (ref. Porta, M. (Ed.) (2008) *A Dictionary of Epidemiology*, New York, Oxford University Press).

**Case ascertainment:** This refers to how clinical cases are sought to make a diagnosis. Case detection, by contrast, refers to how diagnosed cases are identified for inclusion in the study database.

**Sensitivity** is the “probability that a diseased person in the population tested will be identified as diseased by the test”. Specificity on the other hand is “the probability that a person without the disease will be correctly identified as non diseased by the case” (ref. Porta, M. (Ed.) (2008) *A Dictionary of Epidemiology*, New York, Oxford University Press)

**Bias** is defined as “systematic deviation of results or inferences from truth” (ref. Porta, M. (Ed.) (2008) *A Dictionary of Epidemiology*, New York, Oxford University Press)
